# Supplementary material for: COVID-19 Infection during Pregnancy: Disruptions in Lipid Metabolism and Implications for Newborn Health
Source: MDPI journal article supplement (doi:10.3390/ijms241813787), 2023-09-07

CE 16:0

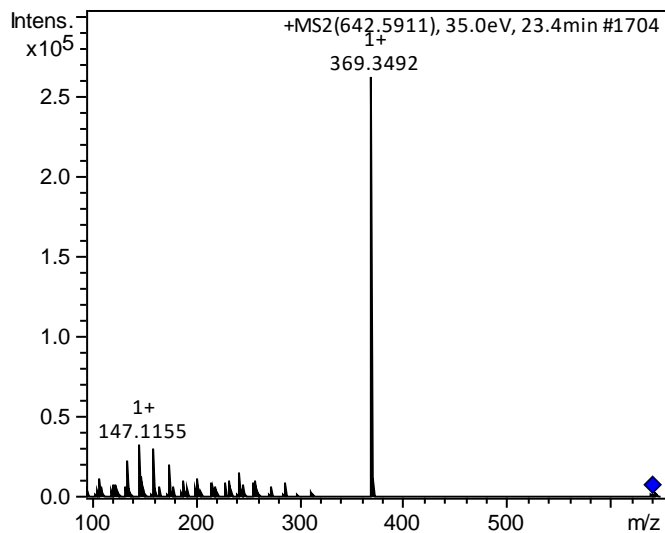

LPC 16:0

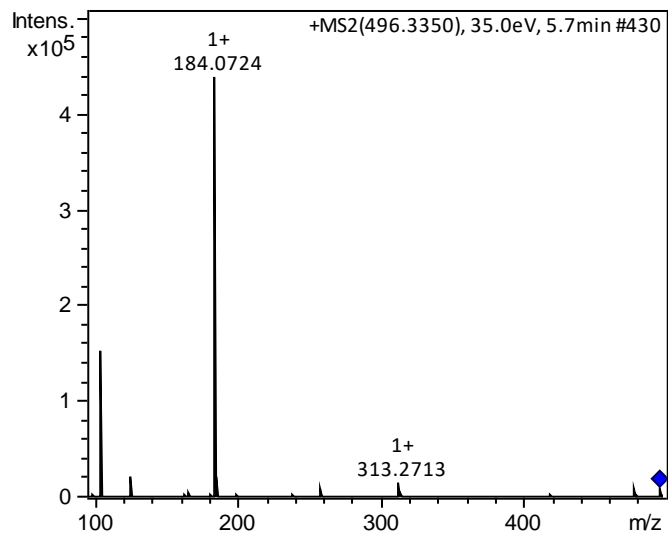

LPC 16:1

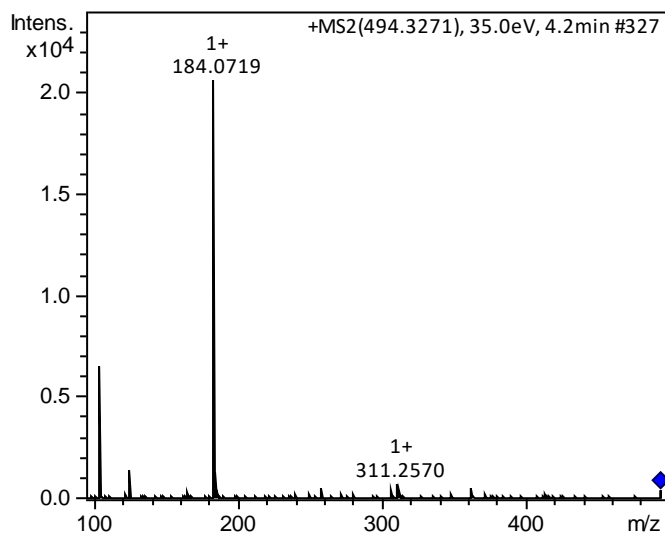

MGDG 16:0\_20:0

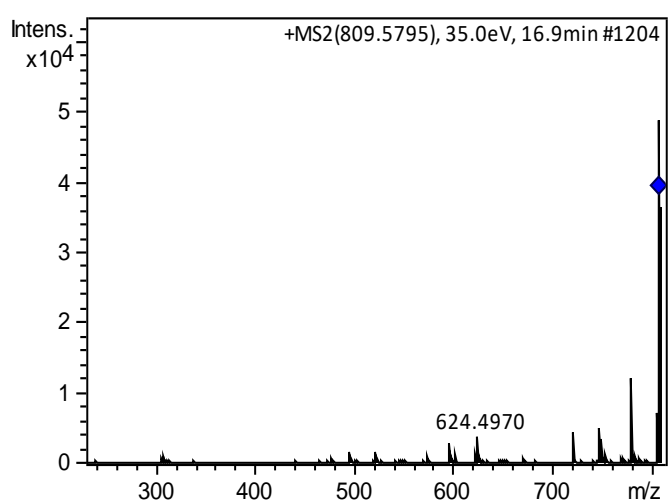

OxCL 18:2\_22:6\_18:3\_22:5(OOH)2

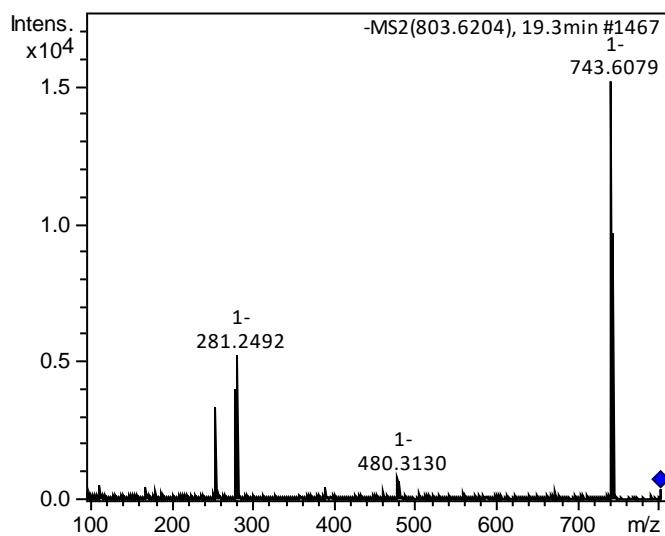

OxLPC 18:4(OOO)

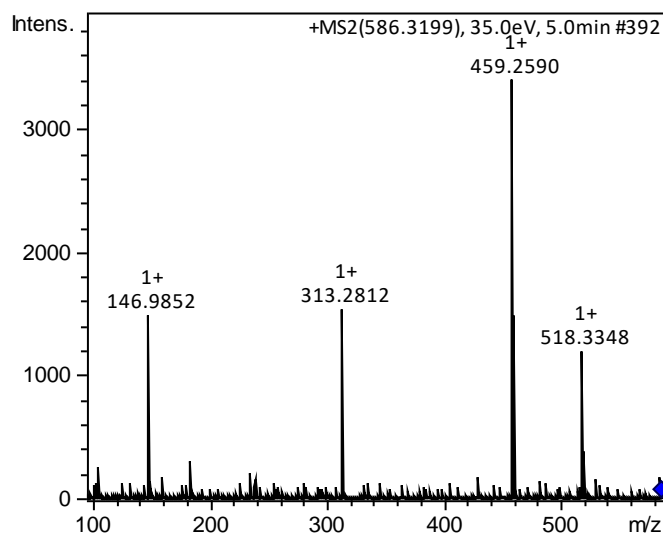

OxPC 18:2\_16:1(COOH)

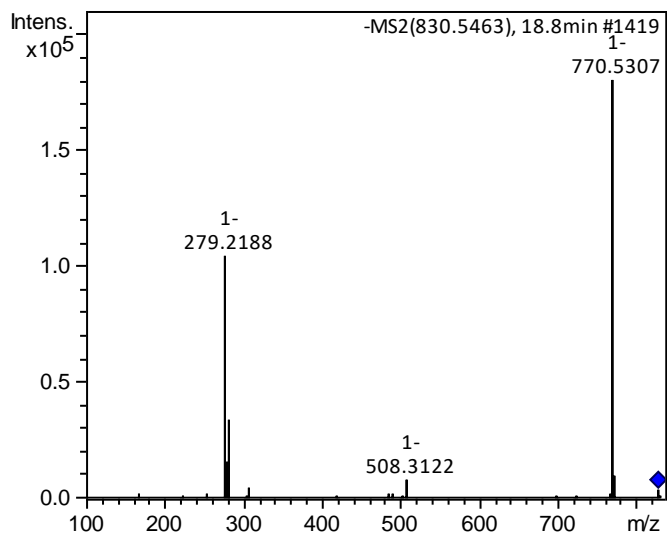

PC 16:0\_16:0

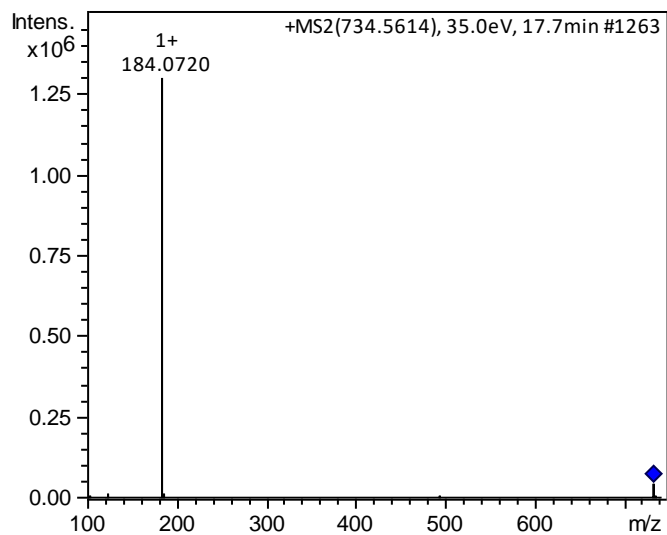

PC 16:0\_18:2

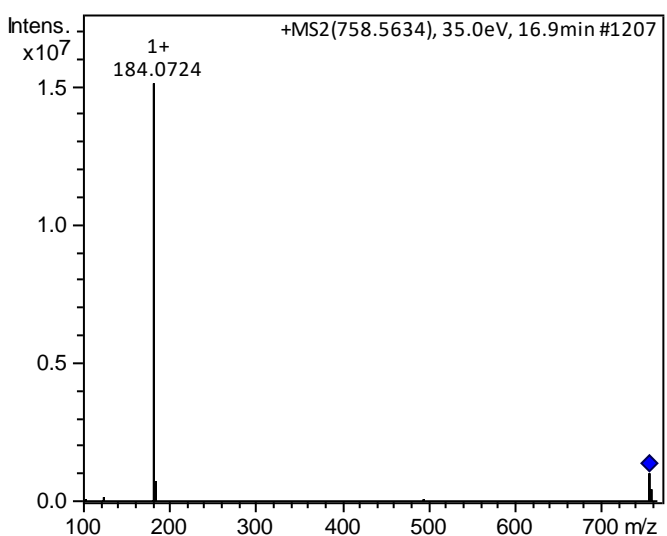

PC 16:0\_20:1

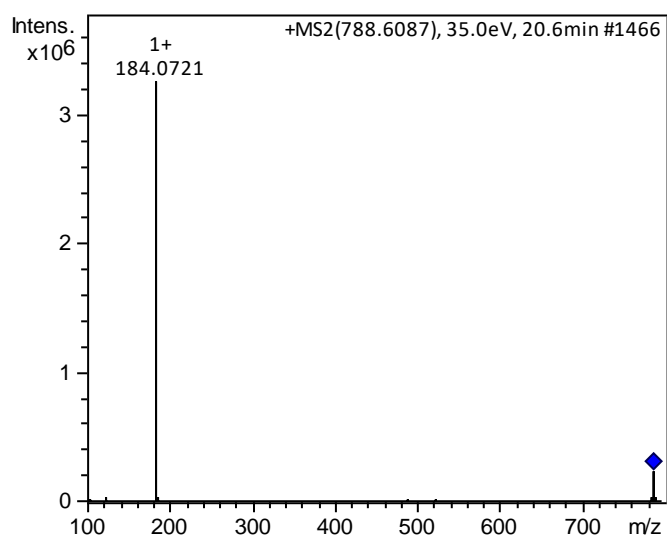

PC 16:0\_20:3

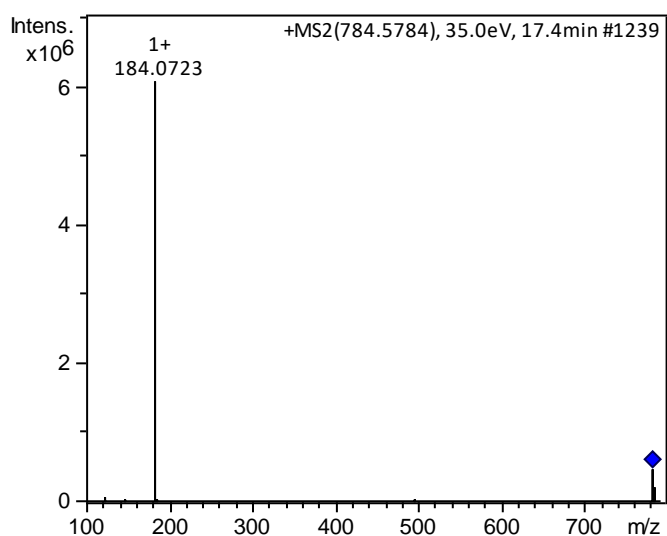

PC 16:0\_20:5

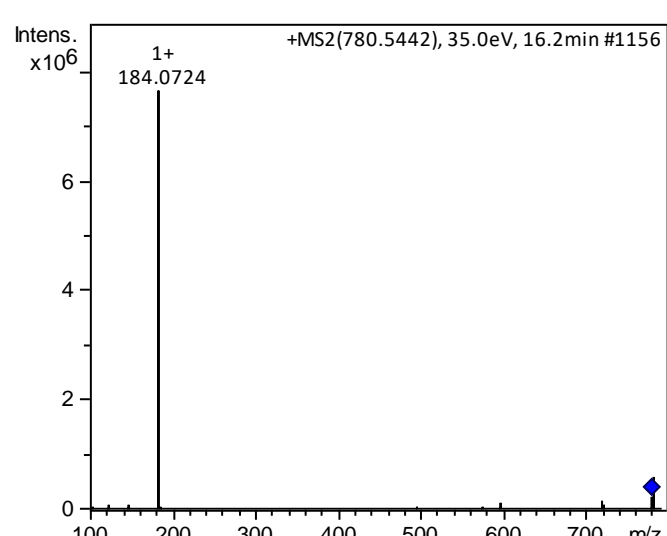

PC 16:0\_22:6

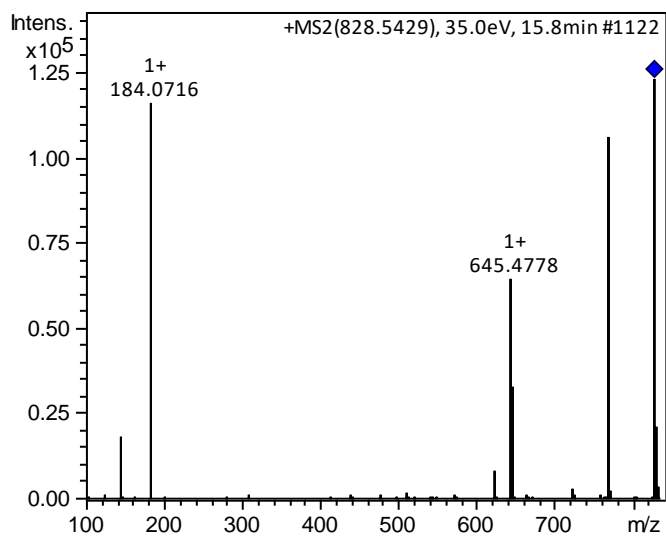

PC 16:1\_18:0

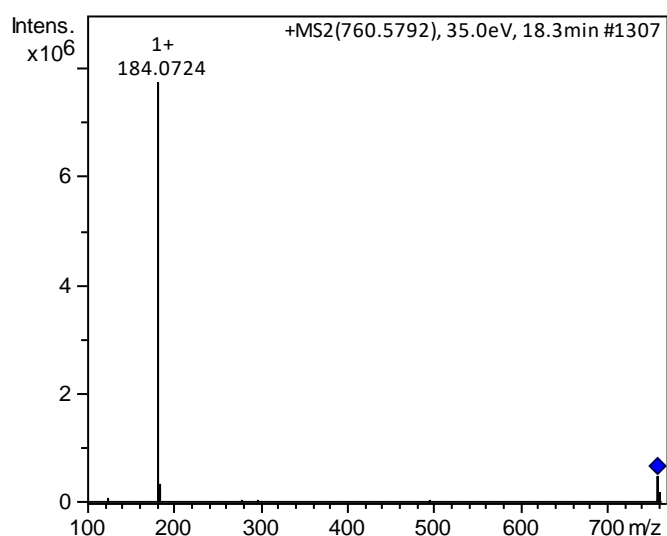

PC 16:1\_22:6

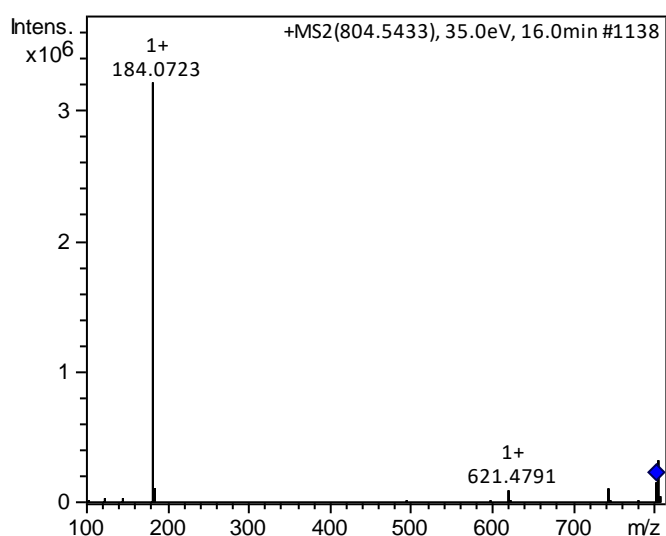

PC 18:0\_18:2

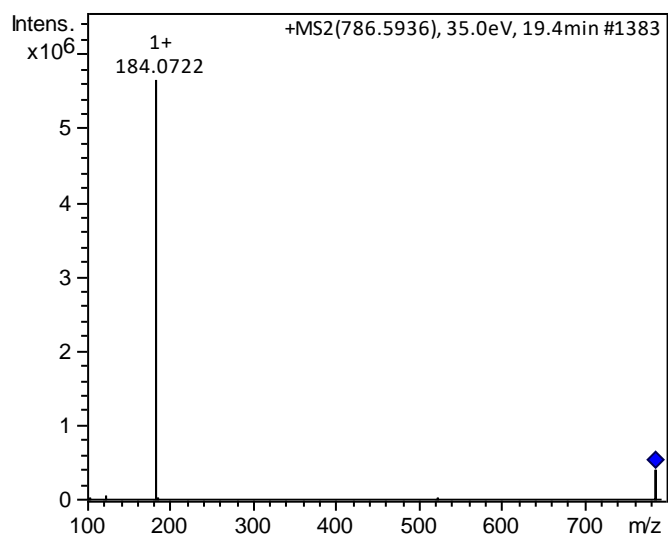

PC 18:1\_18:3

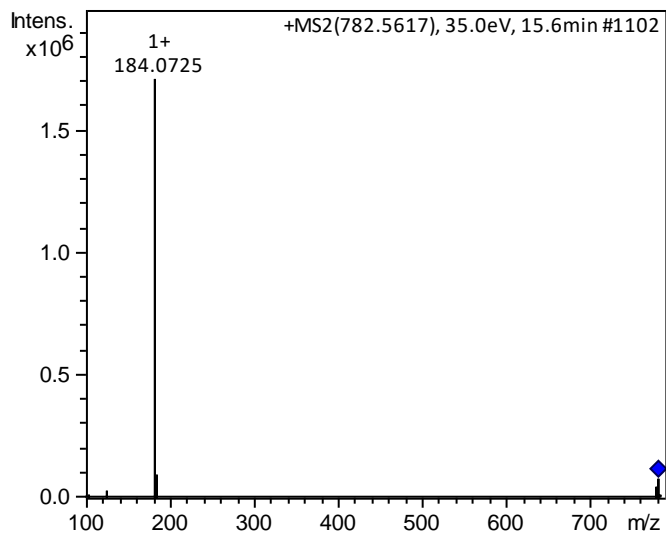

PC 18:1\_20:1

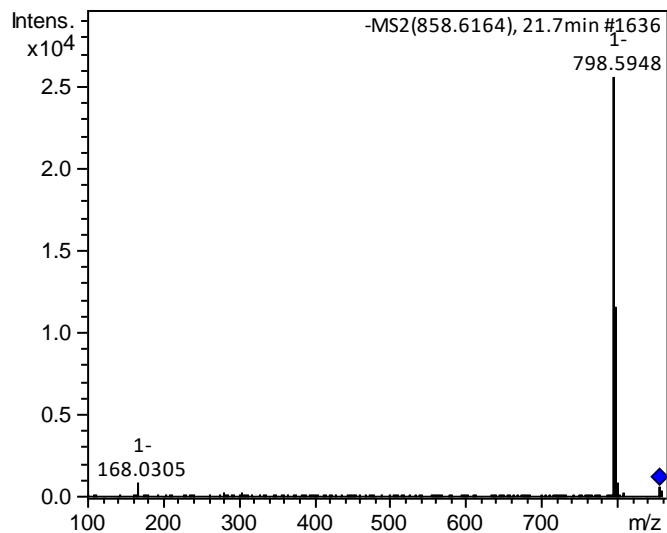

PC 18:2\_18:2

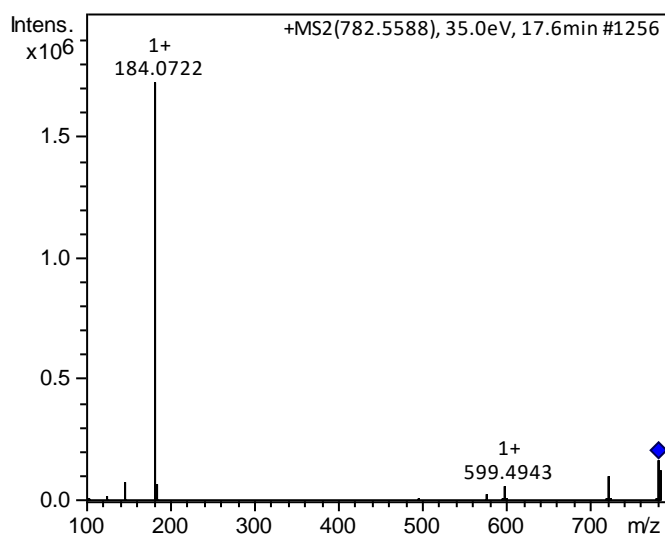

PE 18:0\_20:1

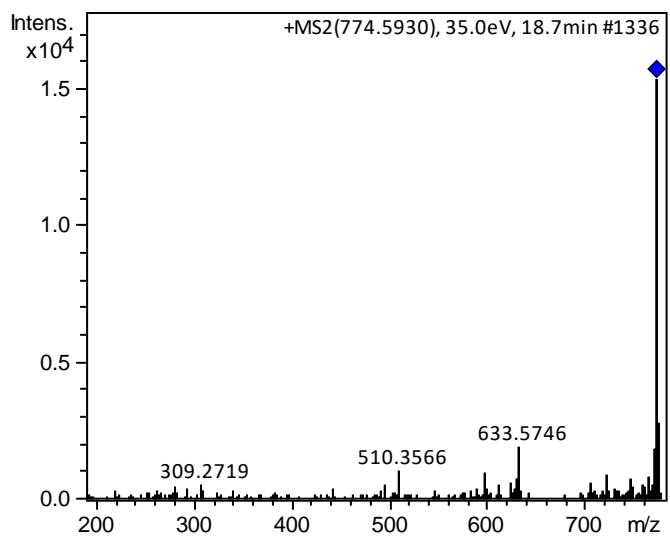

PC O-16:0/20:4

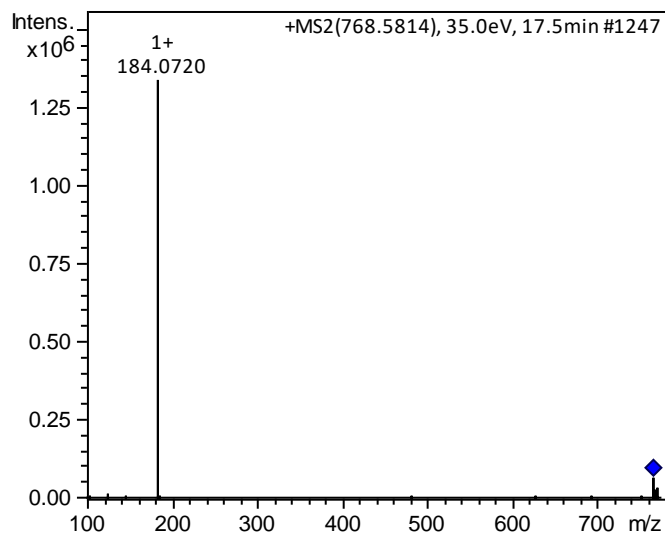

PC O-18:0/18:1

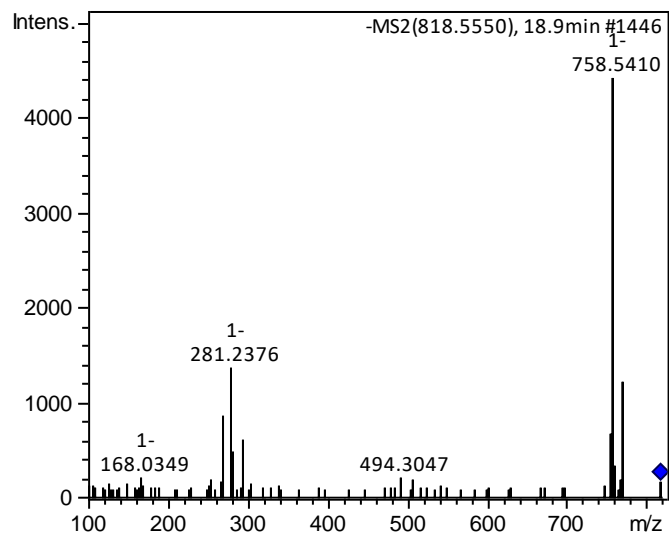

PC P-16:0/18:2

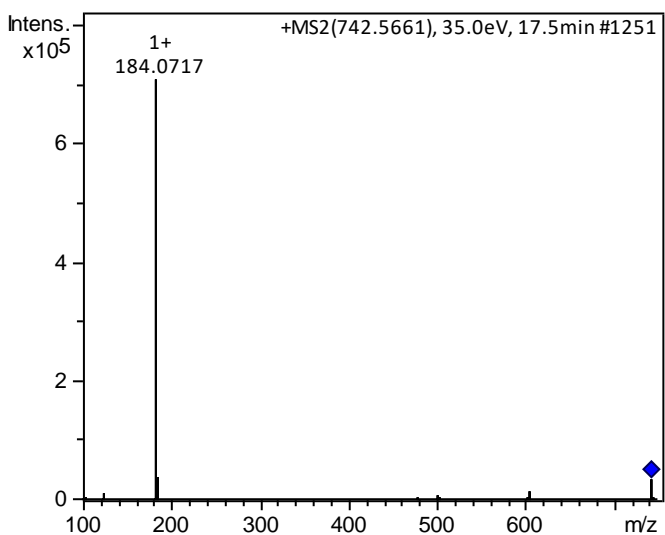

PC P-20:1/18:1

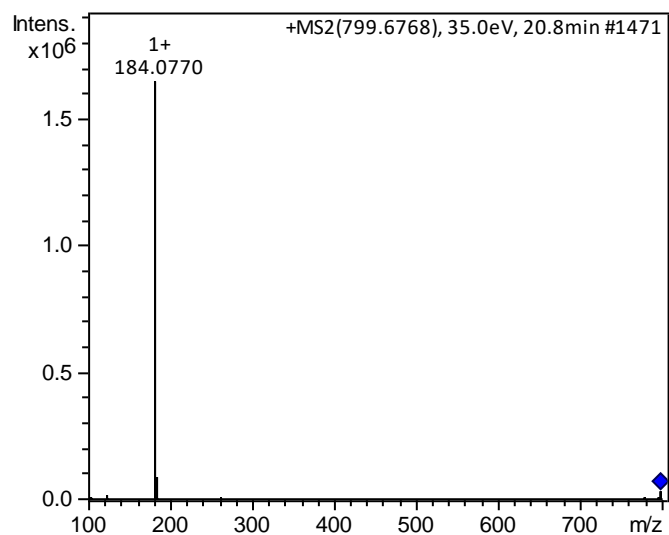

SM d18:0/22:0

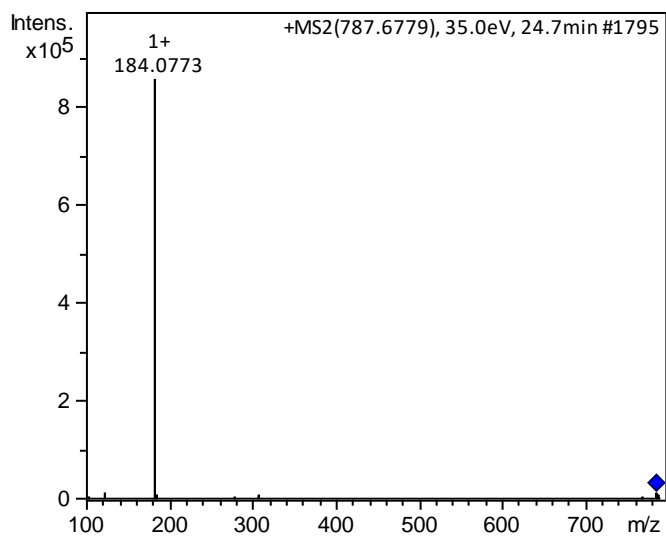

SM d18:1/18:3

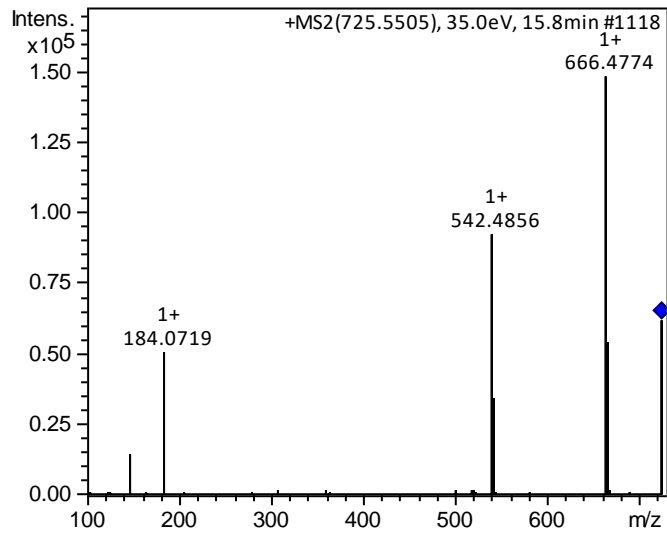

SM d18:1/24:1

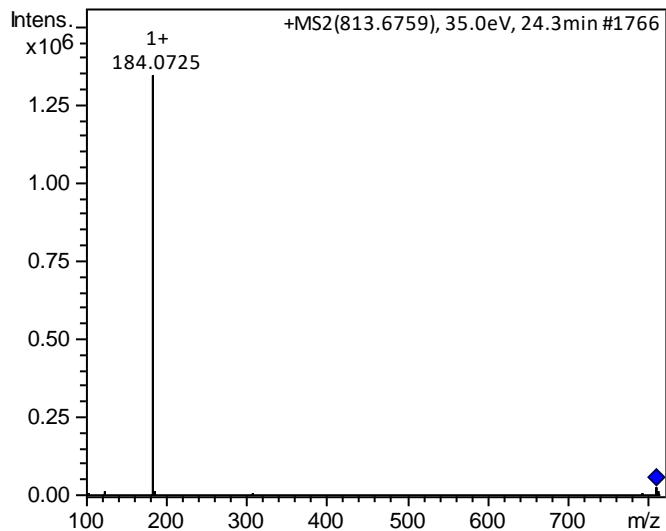

TG 14:0\_16:1\_18:2

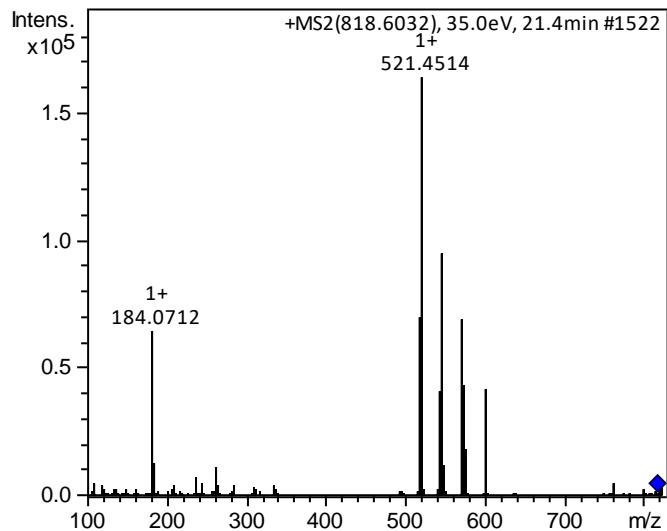

TG 16:0\_16:0\_18:1

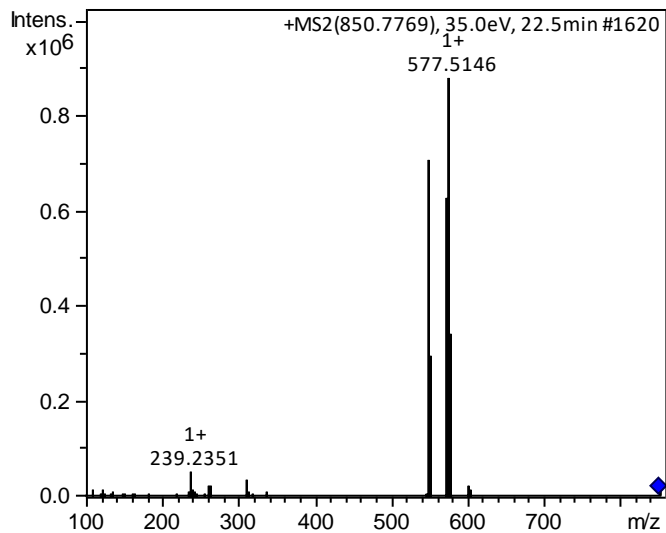

TG 16:0\_16:1\_18:0

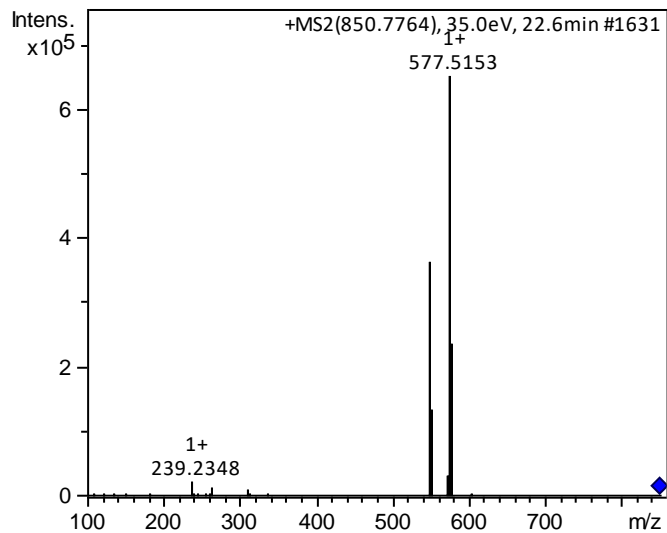

TG 18:1\_18:1\_20:1

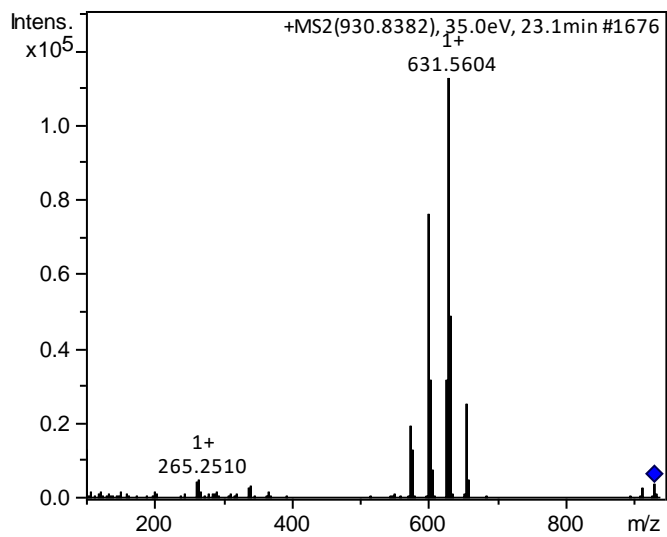

TG 18:1\_22:5\_8:0

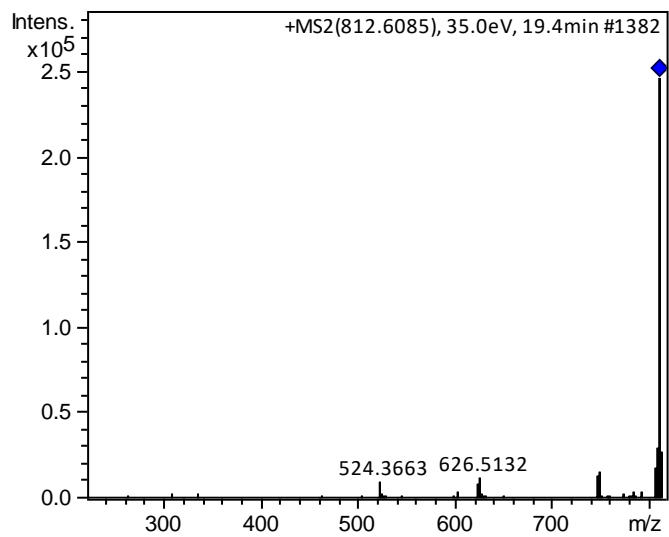

Supplement: s1 [file s1]
