# Supplementary material for: COVID-19 Infection during Pregnancy: Disruptions in Lipid Metabolism and Implications for Newborn Health
Source: MDPI journal article supplement (doi:10.3390/ijms241813787), 2023-09-07
Supplement: s1 [file s1]

Table S1. The number of samples of three biological fluids (maternal blood plasma, cord blood plasma and amniotic fluid) taken from 234 patients at the stage of delivery, whose lipid was determined by HPLC-MS/MS.

|                | Control<br>(n=59) | Ia group<br>(n=41) | Ib group<br>(n=67) | Ic group<br>(n=67) |
|----------------|-------------------|--------------------|--------------------|--------------------|
| mother plasma  | 51                | 27                 | 51                 | 50                 |
| Cord plasma    | 47                | 28                 | 50                 | 49                 |
| amniotic fluid | 50                | 27                 | 52                 | 50                 |

Table S2. Maternal plasma, cord blood, and amniotic fluid lipids, with statistically significant changes in history of Covid 19 infection, compared with controls.

| Lipid                                                   | Control            | Infection           | P     |
|---------------------------------------------------------|--------------------|---------------------|-------|
| Maternal plasma, 1st trimester, positive ion mode       |                    |                     |       |
| LPC 20:4                                                | 8.6e5(6.3e5;1.2e6) | 1.1e6(8.6e5;1.3e6)  | 0.03  |
| OxLPC 18:3(OOO)                                         | 2.1e5(1.6e5;2.6e5) | 2.6e5(2.2e5;3.1e5)  | 0.03  |
| OxTG 16:0_18:1_16:1(CHO)                                | 2.2e5(1.5e5;2.8e5) | 1.5e5(1.3e5;2.3e5)  | 0.03  |
| OxTG 18:0_18:1_16:1(COOH)                               | 1.9e5(1.7e5;2.1e5) | 2.1e5(1.9e5;2.5e5)  | 0.03  |
| LPC O-16:0                                              | 1.7e5(1.4e5;2.2e5) | 2.1e5(1.7e5;2.6e5)  | 0.03  |
| PC O-20:1/18:1                                          | 2.5e6(1.7e6;3.8e6) | 1.6e6(1.0e6;2.9e6)  | 0.04  |
| Maternal blood plasma, 1st trimester, negative ion mode |                    |                     |       |
| LPC 16:0                                                | 2.9e6(2.4e6;4.1e6) | 3.9e6(2.9e6;4.4e6)  | 0.02  |
| LPC 18:2                                                | 4.6e5(3.5e5;5.9e5) | 5.3e5(4.7e5;6.3e5)  | 0.04  |
| LPC 20:4                                                | 1.1e5(7.7e4;1.7e5) | 1.6e5(1.1e5;1.9e5)  | 0.03  |
| PI 16:0_16:0                                            | 6.4e4(4.1e4;9.4e4) | 4.1e4(3.3e4;5.1e4)  | 0.009 |
| PI 16:0_18:1                                            | 2.8e5(2.1e5;4.1e5) | 2.1e5(1.6e5;2.7e5)  | 0.009 |
| PI 18:0_18:2                                            | 9.2e5(7.7e5;1.1e6) | 7.4e5(6.1e5;9.2e5)  | 0.03  |
| PI 18:0_20:3                                            | 2.7e5(2.2e5;3.4e5) | 2.0e5(1.7e5;2.6e5)  | 0.004 |
| PI 18:0_20:4                                            | 1.5e6(1.2e6;1.8e6) | 1.2e6(1.0e6;1.5e6)  | 0.04  |
| PMeOH 18:0_22:4                                         | 5.7e4(4.5e4;6.4e4) | 4.9e4(3.5e4;5.5e4)  | 0.01  |
| SM d20:0/16:0                                           | 2.1e5(1.1e5;3.1e5) | 1.0e5(3.9e4;2.7e5)  | 0.03  |
| Maternal blood plasma, 2nd trimester, positive ion mode |                    |                     |       |
| PE 18:0_20:1                                            | 5.4e5(3.4e5;8.6e5) | 8.1e5(5.1e5;9.9e5)  | 0.04  |
| SM d18:1/18:1                                           | 2.4e6(2.1e6;3.1e6) | 2.3e6(2.0e6;2.6e6)  | 0.049 |
| SM d18:1/18:3                                           | 5.8e6(5.2e6;6.3e6) | 5.5e6(4.8e6;5.9e6)  | 0.03  |
| SM d18:1/24:0                                           | 7.8e6(4.6e6;9.1e6) | 9.6e6(5.8e6;1.3e7)  | 0.02  |
| TG 14:1_18:2_18:3                                       | 2.6e5(1.9e5;3.4e5) | 3.2e5(2.3e5;4.1e5)  | 0.03  |
| TG 16:0_16:1_20:1                                       | 2.2e5(1.5e5;4.5e5) | 3.43e5(2.03e5;7e5)  | 0.03  |
| TG 16:1_18:1_18:4                                       | 1.1e5(8.3e4;1.4e5) | 1.2e5(8.9e4;1.6e5)  | 0.04  |
| TG 16:1_18:2_18:3                                       | 1.7e6(1.3e6;2.1e6) | 1.9e6(1.6e6;2.6e6)  | 0.02  |
| TG 18:0_18:3_18:4                                       | 1.6e5(1.1e5;1.9e5) | 1.8e5(1.3e5;2.25e5) | 0.04  |
| Maternal blood plasma, 2nd trimester, negative ion mode |                    |                     |       |
| LPC 20:4                                                | 1.1e5(7.7e4;1.7e5) | 1.6e5(9.5e4;2.0e5)  | 0.03  |

|                                                         |                    |                     |        |
|---------------------------------------------------------|--------------------|---------------------|--------|
| LPE 16:0                                                | 7.3e4(5.8e4;9.8e4) | 1.0e5(6.3e4;1.3e5)  | 0.01   |
| LPE 18:1                                                | 2.9e4(1.7e4;5.2e4) | 4.6e4(3.1e4;6.6e4)  | 0.01   |
| LPE 20:4                                                | 4.6e4(3.5e4;5.9e4) | 5.4e4(4.3e4;8.2e4)  | 0.01   |
| LPE 22:6                                                | 5.9e4(3.6e4;8.2e4) | 7.8e4(4.0e4;1.1e5)  | 0.04   |
| MGDG 18:2_22:6                                          | 3.0e6(2.8e6;3.4e6) | 3.2e6(2.9e6;3.4e6)  | 0.04   |
| MGDG 20:4_22:6                                          | 1.5e4(4.1e3;2.5e4) | 2.2e4(1.0 e4;3.8e4) | 0.04   |
| PC 16:1_18:2                                            | 7.6e5(6.6e5;8.6e5) | 8.4e5(7.0e5;1.0e6)  | 0.01   |
| PC 18:0_20:3                                            | 8.2e4(7.1e4;9.6e4) | 7.4e4(6.5e4;8.3e4)  | 0.009  |
| PI 16:0_18:1                                            | 2.8e5(2.1e5;4.1e5) | 2.4e5(1.9e5;3.2e5)  | 0.03   |
| PI 18:0_18:2                                            | 9.2e5(7.7e5;1.1e6) | 7.4e5(6.0e5;9.9e5)  | 0.02   |
| PI 18:0_20:3                                            | 2.7e5(2.2e5;3.4e5) | 2.4e5(1.9e5;2.9e5)  | 0.04   |
| PI 18:0_20:4                                            | 1.5e6(1.2e6;1.8e6) | 1.2e6(1.0e6;1.7e6)  | 0.04   |
| PC O-18:0/18:2                                          | 2.1e4(1.5e4;3.0e4) | 3.2e4(1.7e4;7.0e4)  | 0.01   |
| PC O-20:0/20:4                                          | 3.9e4(2.8e4;6.3e4) | 5.9e4(4.0e4;7.6e4)  | 0.01   |
| Maternal plasma, 3rd trimester, positive ion mode       |                    |                     |        |
| LPC 16:0                                                | 1.5e7(9.9e6;2.4e7) | 2.4e7(1.6e7;3.2e7)  | 0.005  |
| LPC 18:0                                                | 5.8e6(4.1e6;8.2e6) | 8.2e6(5.4e6;1.0e7)  | 0.003  |
| LPC 18:1                                                | 2.8e6(2.1e6;3.9e6) | 3.6e6(2.8e6;5.0e6)  | 0.006  |
| LPC 18:2                                                | 3.3e6(2.6e6;4.8e6) | 4.0e6(3.4e6;5.4e6)  | 0.03   |
| LPC 20:3                                                | 3.3e5(2.6e5;4.2e5) | 4.1e5(3.2e5;5.5e5)  | 0.002  |
| LPC 20:4                                                | 8.6e5(6.3e5;1.2e6) | 1.3e6(9.6e5;1.6e6)  | <0.001 |
| LPC 22:6                                                | 4.9e5(4.1e5;6.8e5) | 6.3e5(5.3e5;8.2e5)  | 0.001  |
| OxLPC 18:3(OOO)                                         | 2.1e5(1.6e5;2.8e5) | 2.9e5(2.4e5;3.8e5)  | <0.001 |
| OxTG 16:0_18:1_16:1(CHO)                                | 2.2e5(1.5e5;2.8e5) | 1.5e5(1.2e5;2.4e5)  | 0.03   |
| LPC O-16:0                                              | 1.7e5(1.4e5;2.2e5) | 2.1e5(1.8e5;2.8e5)  | 0.001  |
| TG 16:1_18:1_18:4                                       | 1.1e5(8.3e4;1.4e5) | 1.2e5(9.9e4;1.5e5)  | 0.03   |
| TG 18:0_18:3_18:4                                       | 1.6e5(1.1e5;1.9e5) | 1.8e5(1.3e5;2.6e5)  | 0.02   |
| Maternal blood plasma, 3rd trimester, negative ion mode |                    |                     |        |
| LPC 16:0                                                | 2.9e6(2.4e6;4.1e6) | 3.7e6(3.3e6;4.8e6)  | 0.001  |
| LPC 18:0                                                | 7.2e5(5.1e5;1.0e6) | 9.3e5(7.6e5;1.4e6)  | 0.003  |
| LPC 18:1                                                | 4.3e5(3.0e5;5.8e5) | 4.9e5(3.6e5;7.3e5)  | 0.02   |
| LPC 20:4                                                | 1.1e5(7.7e4;1.7e5) | 1.8e5(1.3e5;2.3e5)  | <0.001 |
| LPC 22:6                                                | 3.9e4(2.9e4;5.9e4) | 5.4e4(3.7e4;8.1e4)  | 0.02   |
| LPE 16:0                                                | 7.3e4(5.8e4;9.8e4) | 1.0e5(7.9e4;1.3e5)  | <0.001 |
| LPE 20:4                                                | 4.6e4(3.5e4;5.9e4) | 6.3e4(4.2e4;8.6e4)  | 0.007  |
| LPE 22:6                                                | 5.9e4(3.6e4;8.2e4) | 7.9e4(5.6e4;1.3e5)  | 0.004  |
| OxCL 18:1(OH)_18:1 (OH)_22:6_22:6                       | 1.2e5(9.9e4;1.4e5) | 1.0e5(8.8e4;1.2e5)  | 0.03   |
| OxPC 18:0_18:4(OO)                                      | 2.2e4(1.2e4;4.5e4) | 3.0e4(1.5e4;9.9e4)  | 0.03   |
| OxPC 18:2_14:1(COOH)                                    | 1.2e6(1.0e6;1.5e6) | 1.0e6(8.2e5;1.3e6)  | 0.01   |
| OxPC 20:4_16:1(COOH)                                    | 4.3e6(3.6e6;4.9e6) | 4.9e6(4.3e6;5.9e6)  | 0.01   |

|                                                     |                    |                    |        |
|-----------------------------------------------------|--------------------|--------------------|--------|
| PC O-16:0/22:4                                      | 3.5e5(6.0e4;4.5e5) | 1.2e5(6.9e4;3.5e5) | 0.01   |
| Cord blood plasma, 1st trimester, positive ion mode |                    |                    |        |
| LPC 20:3                                            | 6.3e5(5.0e5;7.3e5) | 7.1e5(5.7e5;7.9e5) | 0.04   |
| PC 16:0_22:6                                        | 3.8e7(3.2e7;4.3e7) | 4.3e7(3.8e7;4.8e7) | 0.03   |
| PC 18:0_22:6                                        | 1.5e7(1.3e7;1.8e7) | 2.0e7(1.5e7;2.0e7) | 0.02   |
| PE 18:0_20:4                                        | 1.1e6(8.2e5;1.4e6) | 8.6e5(6.2e5;1.1e6) | 0.03   |
| TG 14:0_18:2_22:6                                   | 8.0e5(5.7e5;1.0e6) | 1.0e6(7.3e5;1.2e6) | 0.049  |
| TG 16:0_18:1_20:5                                   | 5.1e5(4.0e5;5.6e5) | 5.8e5(4.5e5;6.9e5) | 0.04   |
| TG 16:0_18:2_22:6                                   | 5.1e6(4.2e6;6.5e6) | 7.0e6(5.4e6;8.1e6) | 0.01   |
| TG 16:0_20:4_22:6                                   | 1.6e6(1.3e6;2.2e6) | 2.4e6(1.5e6;2.8e6) | 0.04   |
| TG 16:1_18:2_22:6                                   | 1.3e6(9.0e5;1.5e6) | 1.6e6(1.4e6;2.0e6) | 0.02   |
| TG 16:1_18:3_22:6                                   | 1.9e5(1.3e5;2.5e5) | 2.6e5(1.8e5;3.1e5) | 0.02   |
| TG 18:0_18:4_20:5                                   | 1.4e5(1.0e5;1.7e5) | 1.8e5(1.2e5;2.0e5) | 0.03   |
| TG 18:1_18:2_20:5                                   | 4.0e5(3.4e5;5.0e5) | 5.2e5(3.8e5;6.0e5) | 0.03   |
| Cord blood plasma, 1st trimester, negative ion mode |                    |                    |        |
| PC 16:0_22:6                                        | 6.0e6(5.1e6;7.1e6) | 7.1e6(6.1e6;7.8e6) | 0.03   |
| PC 18:0_22:6                                        | 2.4e6(2.0e6;3.0e6) | 3.2e6(2.5e6;3.5e6) | 0.008  |
| LPE O-18:0                                          | 6.9e4(3.8e4;1.2e5) | 4.7e4(2.3e4;6.5e4) | 0.049  |
| PE P-16:0/20:4                                      | 2.9e5(1.9e5;4.1e5) | 2.0e5(1.3e5;2.5e5) | 0.02   |
| SM d20:0/18:0                                       | 2.9e4(1e3;2.95e5)  | 1.0e3(1.0e3;4.0e4) | 0.046  |
| SM d20:0/20:1                                       | 4.29e5(1e3;7.93e5) | 6.3e5(2.7e5;1.5e6) | 0.04   |
| SM d22:0/22:5                                       | 1.2e6(1.1e6;1.6e6) | 1.6e6(1.3e6;1.8e6) | 0.02   |
| Cord blood plasma, 2nd trimester, positive ion mode |                    |                    |        |
| LPC 16:0                                            | 6.9e5(5.5e5;8.8e5) | 8.5e5(7.1e5;9.6e5) | 0.01   |
| LPC 18:0                                            | 7.1e6(6.3e6;8.1e6) | 7.8e6(7.1e6;8.8e6) | 0.01   |
| LPE 22:6                                            | 2.9e5(2.4e5;3.3e5) | 3.3e5(2.5e5;3.9e5) | 0.03   |
| PC 16:0_22:6                                        | 3.8e7(3.2e7;4.3e7) | 4.4e7(3.8e7;4.9e7) | 0.002  |
| PC 18:0_20:4                                        | 7.26e7(6.64e7;8e7) | 8.0e7(6.9e7;9.0e7) | 0.03   |
| PC 18:0_22:6                                        | 1.5e7(1.3e7;1.8e7) | 1.8e7(1.5e7;2.1e7) | <0.001 |
| PC 20:1_20:5                                        | 6.1e6(5.0e6;7.1e6) | 7.0e6(6.2e6;7.9e6) | <0.001 |
| TG 16:0_18:1_20:5                                   | 5.1e5(4.0e5;5.6e5) | 5.6e5(4.6e5;6.5e5) | 0.01   |
| TG 16:0_18:1_22:5                                   | 5.1e6(4.1e6;5.5e6) | 5.5e6(4.8e6;6.4e6) | 0.01   |
| TG 16:0_18:1_22:6                                   | 6.9e6(6.1e6;8.3e6) | 7.8e6(6.6e6;9.7e6) | 0.03   |
| TG 16:0_18:2_20:4                                   | 7.1e6(5.6e6;8.0e6) | 8.2e6(6.6e6;9.4e6) | 0.02   |
| TG 16:0_18:2_22:6                                   | 5.1e6(4.2e6;6.5e6) | 6.0e6(4.5e6;8.5e6) | 0.03   |
| TG 16:0_20:4_22:6                                   | 1.6e6(1.3e6;2.2e6) | 2.2e6(1.4e6;2.8e6) | 0.007  |
| TG 16:1_18:2_22:6                                   | 1.3e6(9.0e5;1.5e6) | 1.5e6(1.1e6;2.2e6) | 0.02   |
| TG 16:1_20:4_22:6                                   | 4.2e5(3.0e5;5.7e5) | 5.7e5(3.3e5;8.4e5) | 0.03   |
| TG 18:0_18:4_20:5                                   | 1.4e5(1.0e5;1.7e5) | 1.7e5(1.2e5;2.2e5) | 0.01   |
| TG 18:1_18:1_22:6                                   | 2.2e6(1.9e6;2.5e6) | 2.4e6(2.0e6;2.9e6) | 0.04   |
| TG 18:1_18:2_20:3                                   | 2.9e5(2.5e5;3.4e5) | 3.2e5(2.8e5;3.5e5) | 0.02   |
| TG 18:1_18:2_20:5                                   | 4.0e5(3.4e5;5.0e5) | 4.8e5(3.6e5;6.0e5) | 0.02   |
| TG 18:1_18:2_22:6                                   | 2.3e6(1.9e6;2.8e6) | 2.9e6(2.1e6;3.4e6) | 0.01   |
| TG 18:1_20:4_20:5                                   | 1.6e5(1.2e5;2.0e5) | 2.0e5(1.4e5;2.6e5) | 0.01   |
| TG 18:1_20:4_22:6                                   | 1.1e6(8.1e5;1.3e6) | 1.2e6(9.1e5;1.8e6) | 0.01   |

|                                                     |                    |                    |       |
|-----------------------------------------------------|--------------------|--------------------|-------|
| TG 18:2_20:4_22:6                                   | 8.0e5(6.0e5;1.1e6) | 1.1e6(6.2e5;1.7e6) | 0.02  |
| Cord blood plasma, 2nd trimester, negative ion mode |                    |                    |       |
| CL 18:0_18:0_20:4_22:6                              | 2.5e5(1.1e5;3.9e5) | 1.2e5(8.7e4;2.3e5) | 0.009 |
| LPC 18:0                                            | 1.8e6(1.6e6;2.0e6) | 2.0e6(1.7e6;2.2e6) | 0.03  |
| LPC 22:6                                            | 2.9e5(2.3e5;3.8e5) | 3.6e5(2.8e5;4.3e5) | 0.02  |
| LPE 22:6                                            | 5.2e5(4.1e5;6.0e5) | 6.1e5(4.5e5;7.2e5) | 0.02  |
| OxCL 18:1_18:3(OOH)2_18:3(OOH)2_20:3                | 3.8e4(2.6e4;5.2e4) | 5.0e4(3.6e4;6.6e4) | 0.03  |
| OxLPE 16:1(CHO)                                     | 2.9e4(2.3e4;4.0e4) | 2.1e4(1.3e4;4.5e4) | 0.047 |
| OxPC 16:0_20:3(1O)                                  | 3.6e5(2.6e5;4.8e5) | 4.1e5(3.4e5;5.3e5) | 0.048 |
| OxPC 20:2_16:1(COOH)                                | 5.2e5(3.7e5;6.4e5) | 6.0e5(4.8e5;6.9e5) | 0.04  |
| OxPC 22:4_16:1(Ke,OH)                               | 2.7e4(7.3e3;1.2e5) | 4.2e4(2.5e4;2.6e5) | 0.04  |
| OxPC 22:6_16:1(COOH)                                | 1.8e5(1.6e5;2.0e5) | 2.0e5(1.7e5;2.1e5) | 0.009 |
| PC 16:0_22:6                                        | 6.0e6(5.1e6;7.1e6) | 6.9e6(5.9e6;8.1e6) | 0.004 |
| PC 18:0_22:6                                        | 2.4e6(2.0e6;3.0e6) | 3.1e6(2.5e6;3.4e6) | 0.001 |
| PI 16:0_18:2                                        | 5.9e4(3.2e4;7.6e4) | 7.3e4(5.6e4;8.9e4) | 0.01  |
| PC O-16:1/20:4                                      | 5.3e5(2.3e5;6.5e5) | 6.1e5(4.4e5;7.7e5) | 0.04  |
| PC O-22:1/22:6                                      | 1.7e6(1.4e6;2.1e6) | 2.1e6(1.8e6;2.4e6) | 0.001 |
| PE P-18:1/22:6                                      | 6.8e4(5.9e4;8.4e4) | 7.7e4(6.7e4;9.2e4) | 0.03  |
| SM d22:0/22:5                                       | 1.2e6(1.1e6;1.6e6) | 1.6e6(1.4e6;1.8e6) | 0.001 |
| Cord blood plasma, 3rd trimester, positive ion mode |                    |                    |       |
| LPE 22:6                                            | 2.9e5(2.4e5;3.3e5) | 3.2e5(2.4e5;3.8e5) | 0.03  |
| PC 18:1_20:5                                        | 1.0e7(7.9e6;1.3e7) | 1.2e7(9.4e6;1.4e7) | 0.049 |
| TG 16:0_18:1_22:6                                   | 6.9e6(6.1e6;8.3e6) | 8.0e6(6.5e6;9.4e6) | 0.04  |
| TG 16:0_20:4_22:6                                   | 1.6e6(1.3e6;2.2e6) | 1.9e6(1.4e6;2.6e6) | 0.04  |
| TG 16:1_20:4_22:6                                   | 4.2e5(3.0e5;5.7e5) | 5.0e5(3.9e5;7.5e5) | 0.04  |
| TG 18:0_18:1_18:1                                   | 2.1e6(1.4e6;3.8e6) | 1.4e6(1.1e6;2.5e6) | 0.03  |
| TG 18:0_18:4_20:5                                   | 1.4e5(1.0e5;1.7e5) | 1.5e5(1.2e5;1.9e5) | 0.03  |
| TG 18:1_18:1_22:6                                   | 2.2e6(1.9e6;2.5e6) | 2.4e6(2.1e6;2.8e6) | 0.02  |
| TG 18:1_18:2_22:6                                   | 2.3e6(1.9e6;2.8e6) | 2.7e6(2.1e6;3.3e6) | 0.02  |
| TG 18:1_20:4_22:6                                   | 1.1e6(8.1e5;1.3e6) | 1.2e6(8.9e5;1.7e6) | 0.03  |
| TG 18:2_20:4_22:6                                   | 8.0e5(6.0e5;1.1e6) | 9.8e5(7.3e5;1.4e6) | 0.03  |
| Cord blood plasma, 3rd trimester, negative ion mode |                    |                    |       |
| CL 18:0_18:0_20:4_22:6                              | 2.5e5(1.1e5;3.9e5) | 1.2e5(9.9e4;3.0e5) | 0.047 |
| LPC 18:2                                            | 1.7e6(1.2e6;2.4e6) | 2.1e6(1.4e6;3.0e6) | 0.02  |
| LPC 20:3                                            | 5.1e5(3.6e5;6.1e5) | 6.1e5(4.3e5;7.3e5) | 0.04  |
| LPC 20:5                                            | 2.6e4(2.0e4;3.8e4) | 3.2e4(2.4e4;5.5e4) | 0.048 |
| LPC 22:6                                            | 2.9e5(2.3e5;3.8e5) | 3.7e5(2.7e5;4.3e5) | 0.01  |
| LPE 18:2                                            | 1.9e5(1.5e5;2.4e5) | 2.2e5(1.7e5;2.6e5) | 0.04  |
| LPE 20:4                                            | 5.0e5(4.2e5;6.0e5) | 5.9e5(4.8e5;7.0e5) | 0.008 |
| LPE 22:6                                            | 5.2e5(4.1e5;6.0e5) | 6.5e5(5.1e5;7.6e5) | 0.001 |
| OxPC 20:2_16:1(COOH)                                | 5.2e5(3.7e5;6.4e5) | 5.9e5(4.5e5;7.6e5) | 0.02  |
| OxPC 22:6_16:1(COOH)                                | 1.8e5(1.6e5;2.0e5) | 2.0e5(1.7e5;2.1e5) | 0.04  |
| OxPE 18:2_16:1(COOH)                                | 3.2e5(2.0e5;4.3e5) | 3.9e5(2.8e5;5.1e5) | 0.045 |
| PC 16:0_20:4                                        | 9.3e6(5.8e6;1.2e7) | 1.0e7(8.5e6;1.2e7) | 0.04  |
| PEtOH 16:0_22:4                                     | 3.8e4(2.3e4;8.1e4) | 2.3e4(9.9e3;5.6e4) | 0.047 |
| PC O-16:0/20:4                                      | 1.3e5(9.8e4;1.6e5) | 1.6e5(1.3e5;2.0e5) | 0.006 |

|                                                |                    |                    |       |
|------------------------------------------------|--------------------|--------------------|-------|
| PC O-22:1/22:6                                 | 1.7e6(1.4e6;2.1e6) | 1.9e6(1.6e6;2.3e6) | 0.04  |
| PC O-24:0/20:4                                 | 5.3e5(2.7e5;8.0e5) | 7.6e5(5.5e5;9.9e5) | 0.005 |
| PE P-18:1/22:6                                 | 6.8e4(5.9e4;8.4e4) | 7.6e4(6.6e4;9.7e4) | 0.04  |
| SM d20:1/16:1                                  | 2.9e4(1.0e3;5.0e4) | 5.3e4(1.0e3;1.4e5) | 0.02  |
| SM d24:1/18:1                                  | 7.6e4(3.8e4;1.0e5) | 8.6e4(6.8e4;1.2e5) | 0.02  |
| Amniotic Fluid 1st Trimester Positive Ion Mode |                    |                    |       |
| PC O-16:0/20:4                                 | 8.1e5(5.3e5;1.2e6) | 1.1e6(7.7e5;2.0e6) | 0.045 |
| Amniotic Fluid 1st Trimester Negative Ion Mode |                    |                    |       |
| PI 18:1_20:4                                   | 1.5e5(9.0e4;3.1e5) | 2.8e5(1.9e5;5.2e5) | 0.04  |
| PE P-20:0/18:2                                 | 3.0e4(2.0e4;7.1e4) | 5.4e4(3.4e4;1.3e5) | 0.01  |
| Amniotic Fluid 2nd Trimester Positive Ion Mode |                    |                    |       |
| PC 16:0_18:1                                   | 6.6e7(4.7e7;9.3e7) | 5.0e7(2.2e7;7.9e7) | 0.03  |
| SM d22:5/22:1                                  | 5.8e5(3.6e5;1.1e6) | 1.0e6(5.8e5;1.5e6) | 0.049 |
| TG 16:0_22:2_26:0                              | 5.1e5(3.1e5;1.1e6) | 4.2e5(2.8e5;5.8e5) | 0.03  |
| Amniotic Fluid 2nd Trimester Negative Ion Mode |                    |                    |       |
| LPG 16:0                                       | 1.6e5(1.0e3;5.4e5) | 2.9e4(1.0e3;1.6e5) | 0.03  |
| PC 18:1_18:1                                   | 1.1e6(5.5e5;2.9e6) | 4.8e5(1.0e3;2.2e6) | 0.04  |
| PI 16:0_18:1                                   | 4.5e5(2.2e5;8.7e5) | 2.1e5(5.3e4;7.4e5) | 0.01  |
| PI 18:1_22:5                                   | 2.0e5(1.1e5;3.2e5) | 1.3e5(5.8e4;2.6e5) | 0.03  |
| Amniotic Fluid 3rd Trimester Positive Ion Mode |                    |                    |       |
| PC 14:1_16:0                                   | 3.9e6(2.0e6;7.0e6) | 3.1e6(1.4e6;4.5e6) | 0.049 |
| PG 18:0_18:1                                   | 5.6e5(3.8e5;8.1e5) | 3.5e5(2.2e5;5.4e5) | 0.002 |
| PC O-18:0/16:1                                 | 6.1e5(3.1e5;9.2e5) | 8.9e5(4.2e5;1.5e6) | 0.04  |
| SM d22:6/18:2                                  | 5.1e5(4.3e5;7.6e5) | 4.5e5(3.3e5;6.6e5) | 0.02  |
| Amniotic Fluid 3rd Trimester Negative Ion Mode |                    |                    |       |
| LPG 16:0                                       | 1.6e5(1.0e3;5.4e5) | 6.7e3(1.0e3;1.6e5) | 0.03  |
| MGDG 16:0_18:0                                 | 1.7e4(5.5e3;3.0e4) | 2.6e4(1.8e4;1.2e5) | 0.006 |
| PC 18:1_18:1                                   | 1.1e6(5.5e5;2.9e6) | 9.1e5(1.0e3;1.8e6) | 0.02  |

Table S3. OPLS-model quality characteristic.

| Task                                   | R <sup>2</sup> X | R <sup>2</sup> Y | Q <sup>2</sup> Y |
|----------------------------------------|------------------|------------------|------------------|
| Health child, control group            | 0.35             | 0.29             | -0.42            |
| Health child, the 1-st trimester group | 0.41             | 0.51             | -0.32            |
| Health child, the 2-nd trimester group | 0.41             | 0.30             | -0.45            |
| Health child, the 3-rd trimester group | 0.42             | 0.32             | -0.54            |
| CHD, the control group                 | 0.35             | 0.35             | -0.21            |
| CHD, the 2-nd trimester group          | 0.41             | 0.26             | -0.34            |

Table S4. Model variables for determining whether a child will be healthy in the control group according to the plasma metabolomic profile

| Variable                        | VIP (OPLS) | $\beta$                 | CI $\beta$                                        | Wald criterion | P     |
|---------------------------------|------------|-------------------------|---------------------------------------------------|----------------|-------|
| Free term                       | -          | 21.57                   | 10.21 - 42.35                                     | 2.80           | 0.005 |
| PC 16:0_16:0 *TG 14:0_16:1_18:2 | 1.13       | -5.43*10 <sup>-12</sup> | -1.09*10 <sup>-11</sup> - -2.58*10 <sup>-12</sup> | -2.75          | 0.006 |
| OxLPC 18:4(OOO) * PC 16:0_18:2  | 1.03       | -5.91*10 <sup>-13</sup> | -1.20*10 <sup>-12</sup> - -2.60*10 <sup>-13</sup> | -2.63          | 0.009 |

|                                     |      |                         |                                                 |       |      |
|-------------------------------------|------|-------------------------|-------------------------------------------------|-------|------|
| PC P-16:0/18:2 * TG 16:0_16:0_18:1  | 1.45 | $3.85 \times 10^{-13}$  | $1.61 \times 10^{-13} - 8.01 \times 10^{-13}$   | 2.52  | 0.01 |
| PC 16:0_20:5 * OxPC 18:2_16:1(COOH) | 1.51 | $-1.88 \times 10^{-14}$ | $-3.89 \times 10^{-14} - -6.57 \times 10^{-15}$ | -2.42 | 0.02 |

Table S5. Model variables for determining whether a baby will be healthy in a cohort of patients infected with COVID-19 during the first trimester of pregnancy by plasma metabolomic profile.

| Variable                | VIP (OPLS) | $\beta$                 | CI $\beta$                                      | Wald criterion | P    |
|-------------------------|------------|-------------------------|-------------------------------------------------|----------------|------|
| Free term               | -          | 4.53                    | 0.97 - 10.77                                    | 1.93           | 0.05 |
| PC 16:1_18:0 * LPC 16:1 | 1.31       | $-1.17 \times 10^{-12}$ | $-2.56 \times 10^{-12} - -3.88 \times 10^{-13}$ | -2.24          | 0.03 |

Table S6. Model variables for determining whether a baby will be healthy in a cohort of patients infected with COVID-19 during the second trimester of pregnancy by plasma metabolomic profile.

| Variable                               | VIP (OPLS) | $\beta$                 | CI $\beta$                                      | Wald criterion | P     |
|----------------------------------------|------------|-------------------------|-------------------------------------------------|----------------|-------|
| Free term                              | -          | 15.22                   | 6.97 - 28.60                                    | 2.80           | 0.005 |
| PC 16:0_20:1 * TG 16:0_16:1_18:0       | 1.90       | $-2.95 \times 10^{-13}$ | $-5.67 \times 10^{-13} - -1.27 \times 10^{-13}$ | -2.69          | 0.007 |
| SM d18:0/22:0 * TG 18:1_22:5_8:0       | 1.56       | $-2.09 \times 10^{-13}$ | $-3.82 \times 10^{-13} - -9.74 \times 10^{-14}$ | -2.93          | 0.003 |
| MGDG 16:0_20:0 * SM d18:0/22:0         | 1.23       | $4.48 \times 10^{-13}$  | $1.32 \times 10^{-13} - 9.27 \times 10^{-13}$   | 2.28           | 0.02  |
| PC 18:1_18:3 *<br>OxPC 18:2_16:1(COOH) | 4.48       | $-3.36 \times 10^{-14}$ | $-6.84 \times 10^{-14} - -9.99 \times 10^{-15}$ | -2.31          | 0.02  |

Table S7. Model variables for determining whether a baby will be healthy in a cohort of patients infected with COVID-19 during the third trimester of pregnancy by plasma metabolomic profile.

| Variable                      | VIP (OPLS) | $\beta$                 | CI $\beta$                                      | Wald criterion | P     |
|-------------------------------|------------|-------------------------|-------------------------------------------------|----------------|-------|
| Free term                     | -          | 6.22                    | 1.88 - 12.82                                    | 2.33           | 0.02  |
| SM d18:1/24:1 * PC 18:1_20:1  | 2.88       | $-2.01 \times 10^{-13}$ | $-4.05 \times 10^{-13} - -3.00 \times 10^{-14}$ | -2.55          | 0.01  |
| PC 16:0_22:6 * PC O-16:0/20:4 | 1.59       | $-5.41 \times 10^{-13}$ | $-1.04 \times 10^{-12} - -2.39 \times 10^{-13}$ | -2.74          | 0.006 |
| PC 16:1_22:6 * PC 16:0_22:6   | 1.32       | $2.36 \times 10^{-13}$  | $9.42 \times 10^{-14} - 4.67 \times 10^{-13}$   | 2.59           | 0.01  |
| LPC 16:0 * PC P-20:1/18:1     | 1.56       | $-6.50 \times 10^{-14}$ | $-1.39 \times 10^{-13} - -2.00 \times 10^{-14}$ | -2.15          | 0.03  |

Table S8. Model variables for determining CHD in a child, in a control group of patients according to the plasma metabolomic profile.

| Variable                                         | VIP (OPLS) | $\beta$                 | CI $\beta$                                      | Wald criterion | P    |
|--------------------------------------------------|------------|-------------------------|-------------------------------------------------|----------------|------|
| Free term                                        | -          | -20.04                  | -42.68 - -7.67                                  | -2.29          | 0.02 |
| PC 18:2_18:2 *<br>OxCL 18:2_22:6_18:3_22:5(OOH)2 | 2.96       | $3.33 \times 10^{-13}$  | $1.32 \times 10^{-13} - -6.98 \times 10^{-13}$  | 2.36           | 0.02 |
| PC 18:0_18:2 * PC O-18:0/18:1                    | 1.10       | $-1.81 \times 10^{-13}$ | $-3.90 \times 10^{-13} - -6.21 \times 10^{-14}$ | -2.31          | 0.02 |

Table S9. Model variables for the determination of CHD in a child, in a group of patients infected with COVID-19 during the second trimester of pregnancy according to the plasma metabolomic profile.

| Variable                         | VIP (OPLS) | $\beta$                | CI $\beta$                                      | Wald criterion | P     |
|----------------------------------|------------|------------------------|-------------------------------------------------|----------------|-------|
| Free term                        | -          | 4.26                   | 0.14 - 9.98                                     | 1.77           | 0.08  |
| CE 16:0 * TG 18:1_22:5_8:0       | 1.10       | $3.42 \cdot 10^{-13}$  | $1.70 \cdot 10^{-13}$ - $6.01 \cdot 10^{-13}$   | 3.22           | 0.001 |
| LPC 16:0 * PE 18:0_20:1          | 1.01       | $-1.65 \cdot 10^{-13}$ | $-3.01 \cdot 10^{-13}$ - $-6.79 \cdot 10^{-14}$ | -2.86          | 0.004 |
| PC 16:0_20:3 * TG 18:1_18:1_20:1 | 1.77       | $-8.28 \cdot 10^{-14}$ | $-1.77 \cdot 10^{-13}$ - $-1.86 \cdot 10^{-14}$ | -2.06          | 0.04  |
| PC 16:0_16:0 * SM d18:1/18:3     | 1.26       | $-1.31 \cdot 10^{-13}$ | $-2.63 \cdot 10^{-13}$ - $-3.11 \cdot 10^{-14}$ | -2.29          | 0.02  |

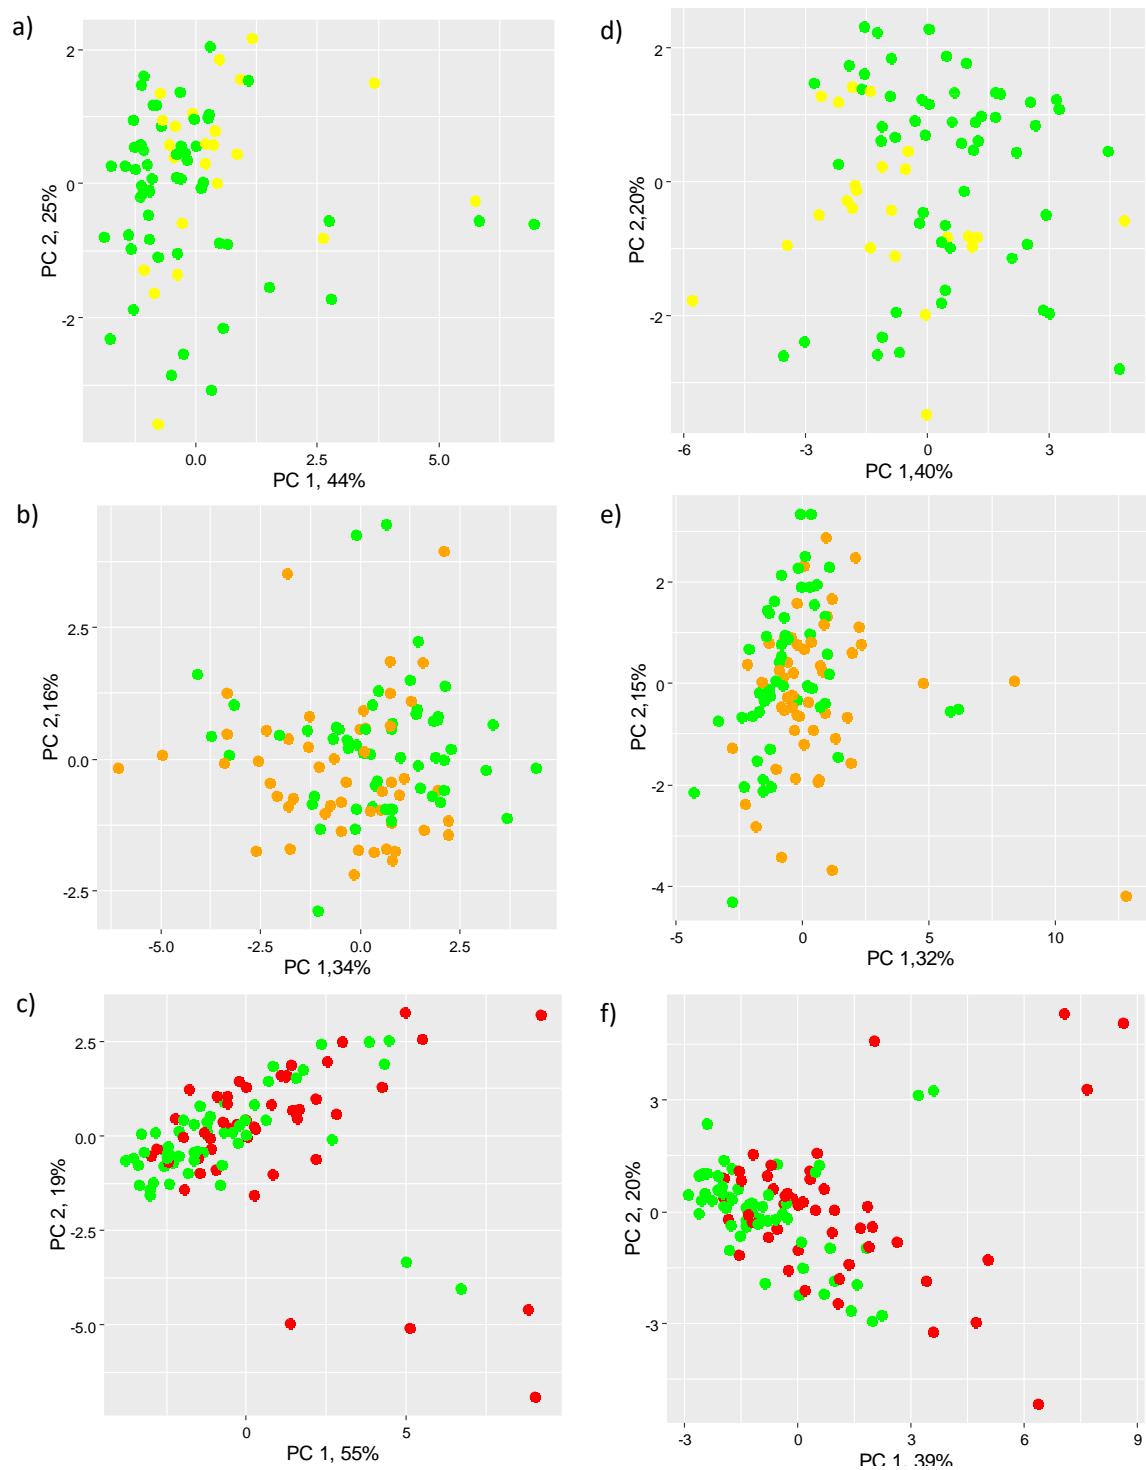

Figure S1. Maternal venous plasma samples in principal component spaces, which are based on statistical significantly differences lipid between two groups. a)-c) – positive ion mode, d)-f) – negative ion mode. Green – control group samples, yellow – covid during the 1st trimester group sample, orange - covid during the 2nd trimester group sample, red - covid during the 3rd trimester group sample.

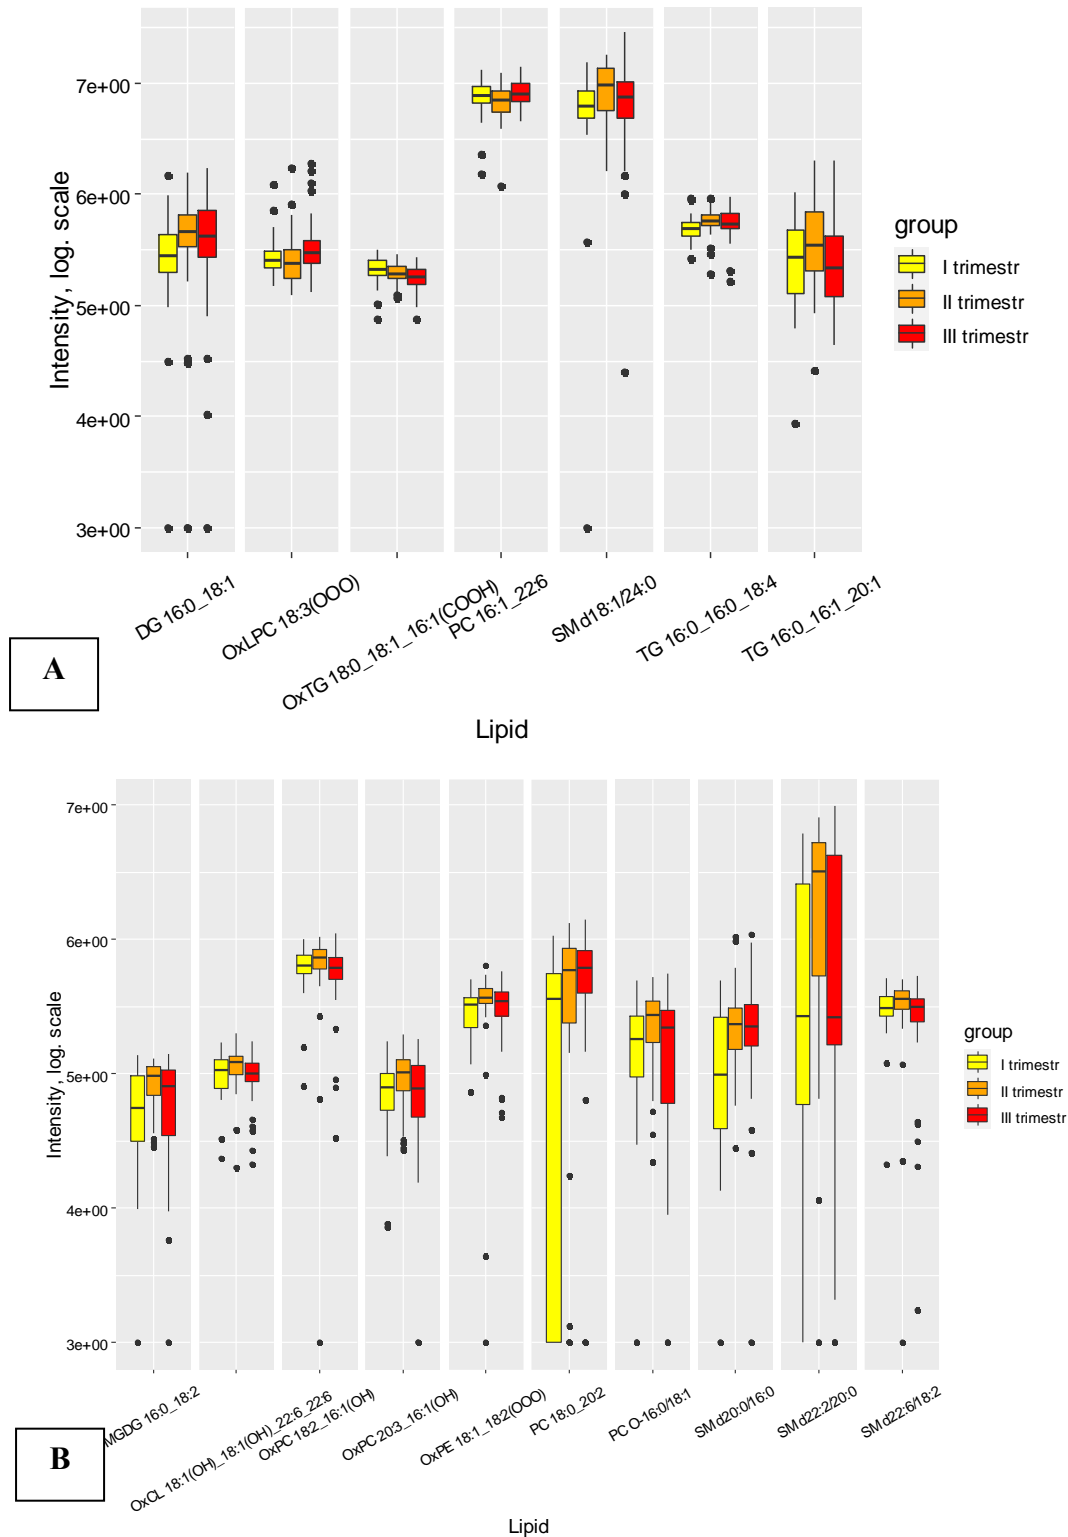

Figure S2. Lipids characterizing differences in the time of infection in maternal plasma (mode of positive (A) and negative (B) ions).



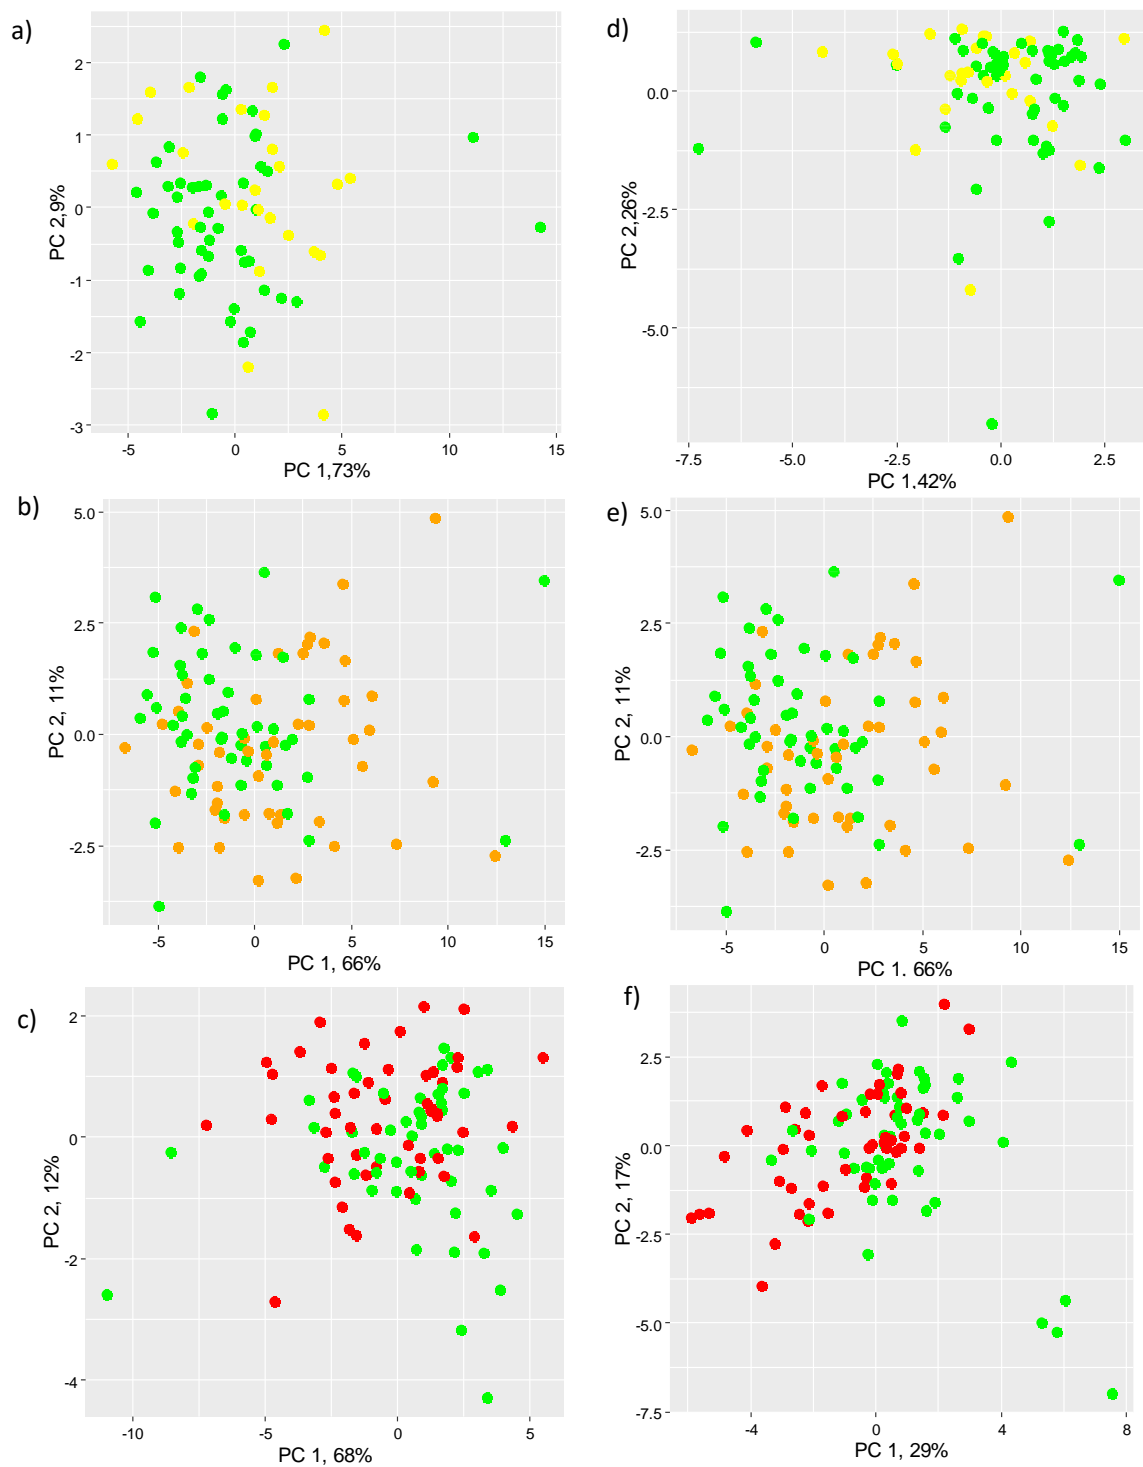

Figure S3. Cord plasma samples in principal component spaces, which are based on statistical significant differences in lipid composition between two groups. a)-c) – positive ion mode, d)-f) – negative ion mode. Green – control group samples, yellow – covid during the 1st trimester group sample, orange - covid during the 2nd trimester group sample, red - covid during the 3rd trimester group sample.

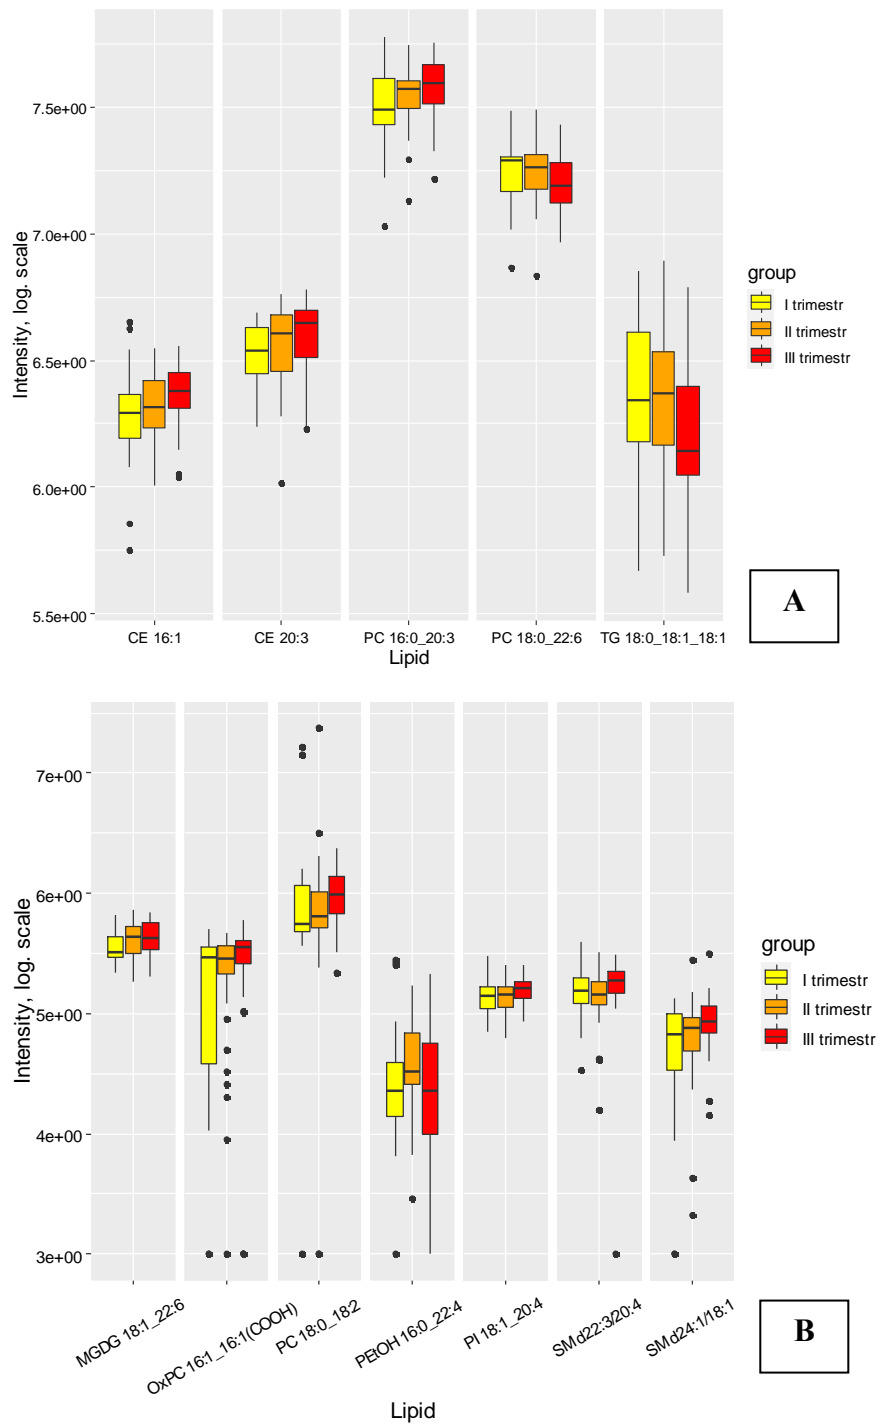

Figure S4. Lipids characterizing differences in the time of infection in umbilical cord plasma (mode of positive (A) and negative (B) ions).

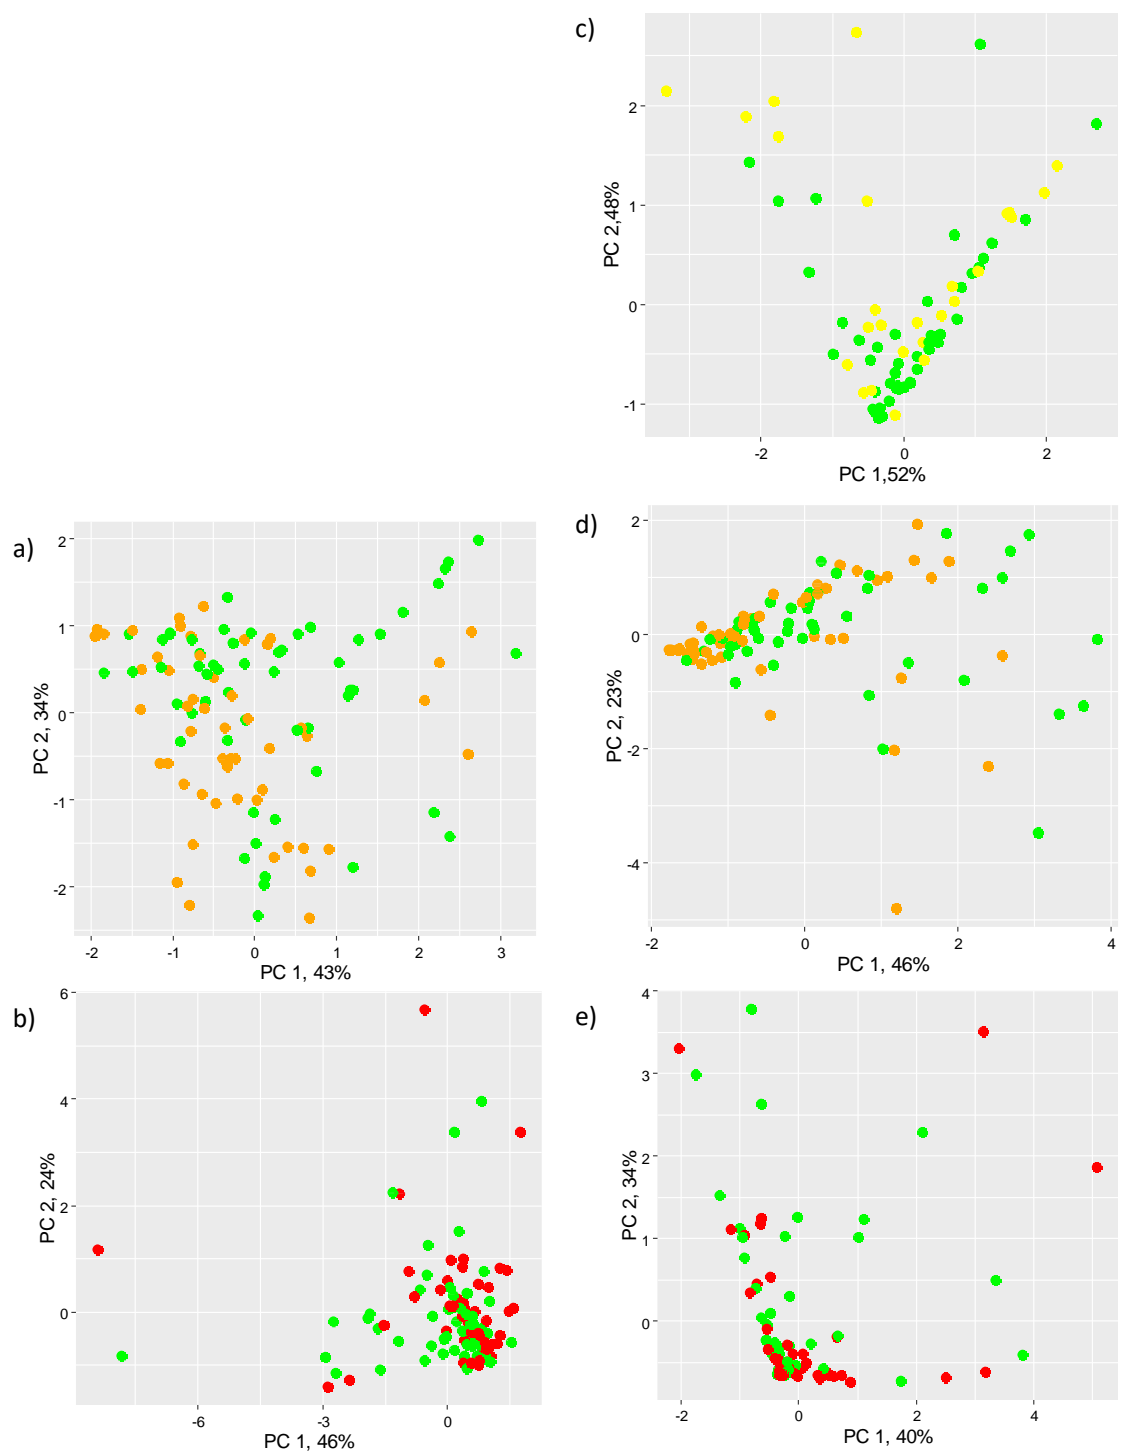

Figure S5. Amniotical fluid samples in principal component spaces, which are based on statistical significantly differences lipid between two groups. a)-c) – positive ion mode, d)-f) – negative ion mode. Green – control group samples, yellow – covid during the 1st trimester group sample, orange - covid during the 2nd trimester group sample, red - covid during the 3rd trimester group sample.
