# Supplementary material for: COVID-19 Infection during Pregnancy: Disruptions in Lipid Metabolism and Implications for Newborn Health
Source: MDPI journal article supplement (doi:10.3390/ijms241813787), 2023-09-07

# Maternal plasma, positive ion mode

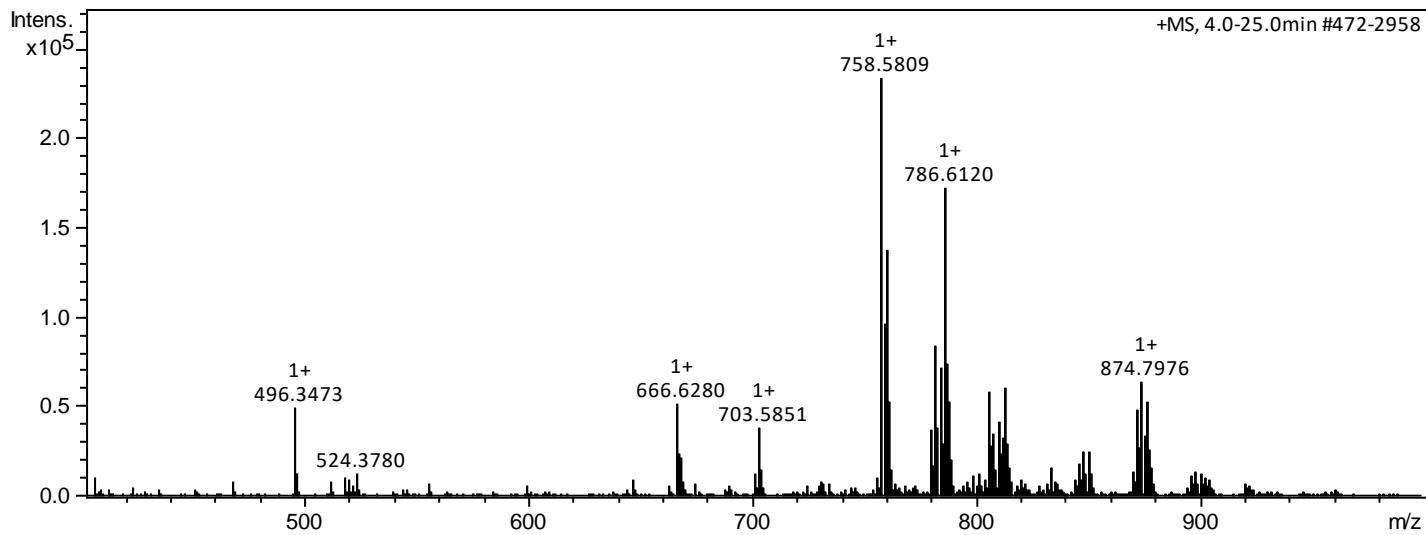

# Maternal plasma, negative ion mode

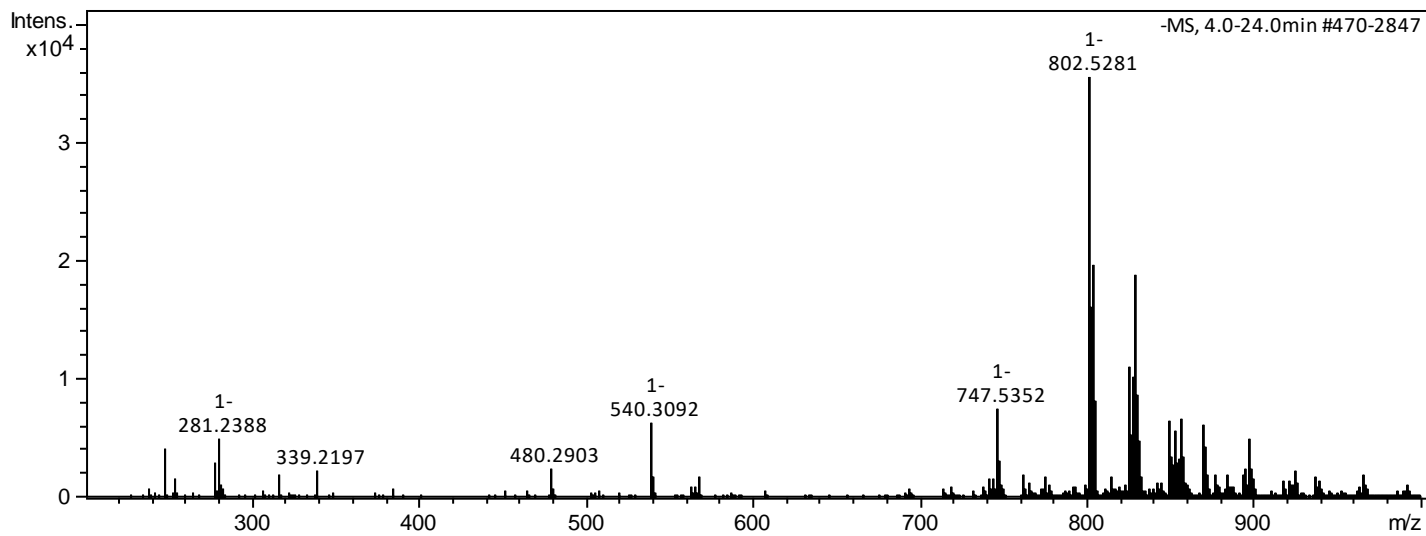

# Cord plasma, positive ion mode

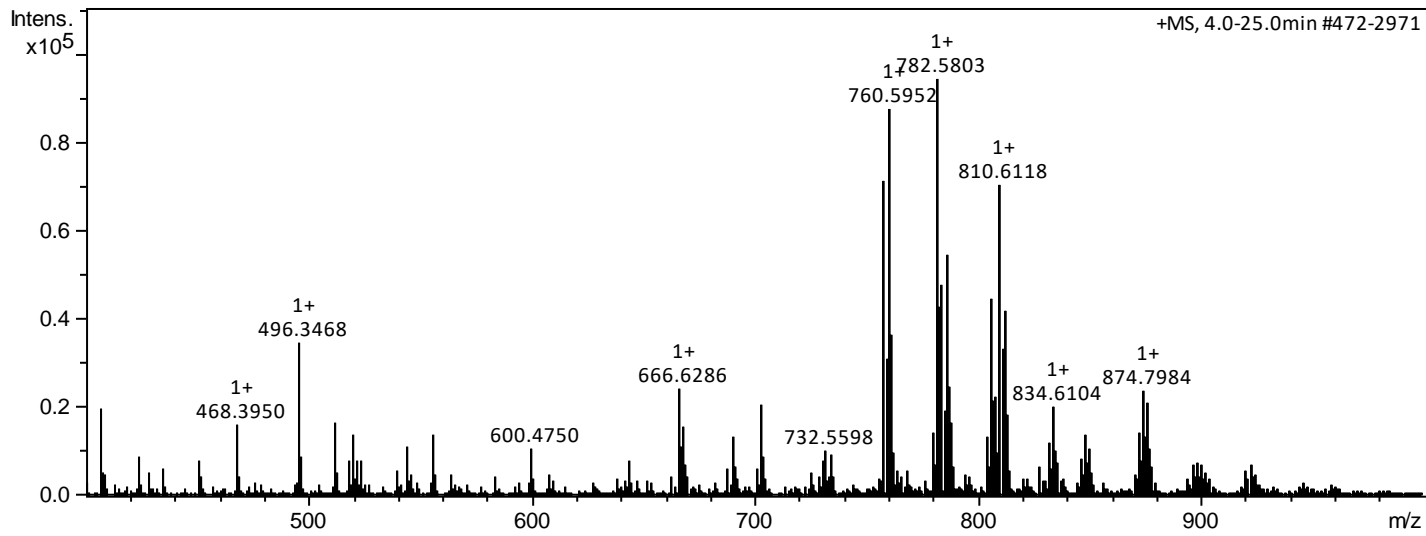

# Cord plasma, negative ion mode

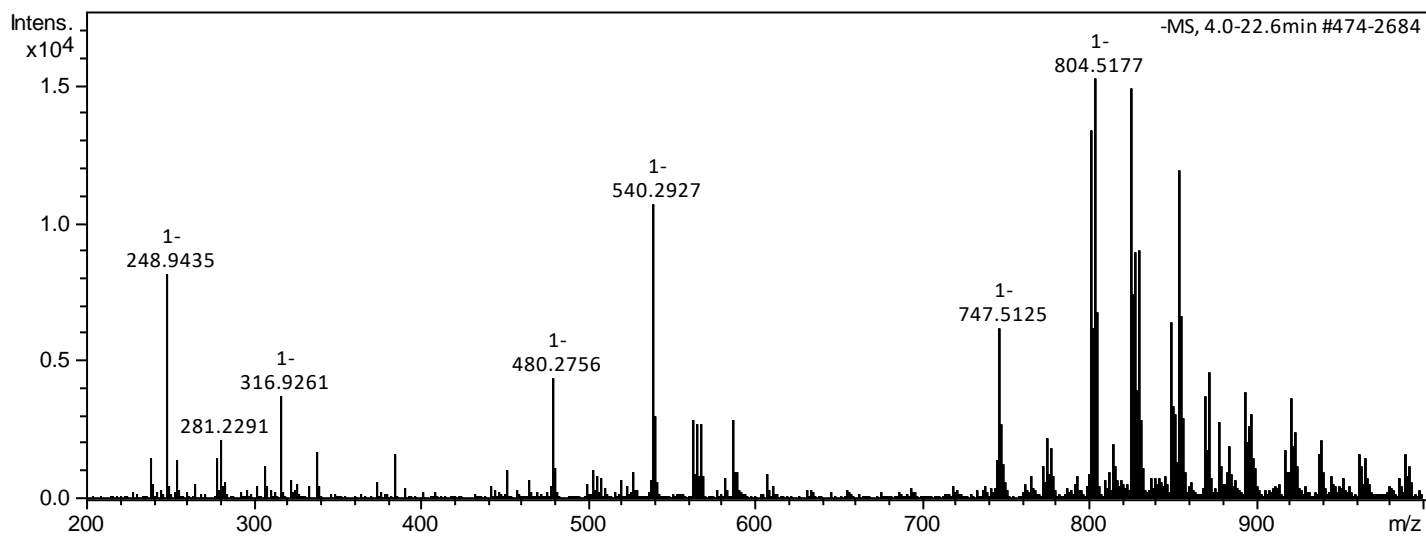

# Amniotic fluid, positive ion mode

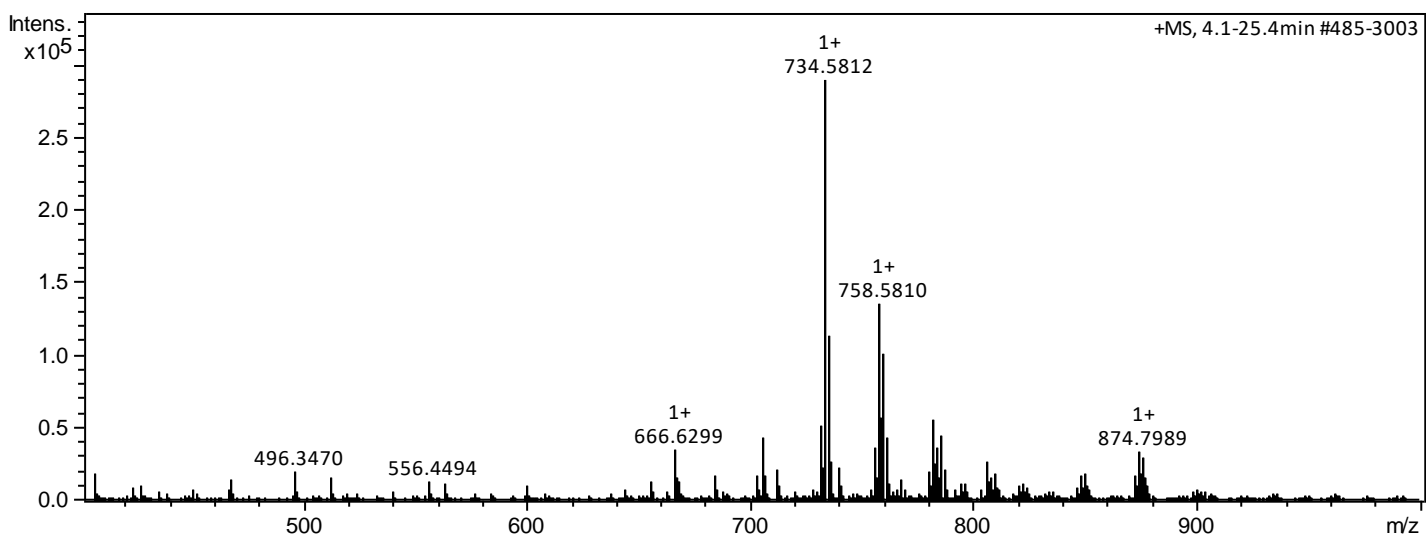

# Amniotic fluid, negative ion mode

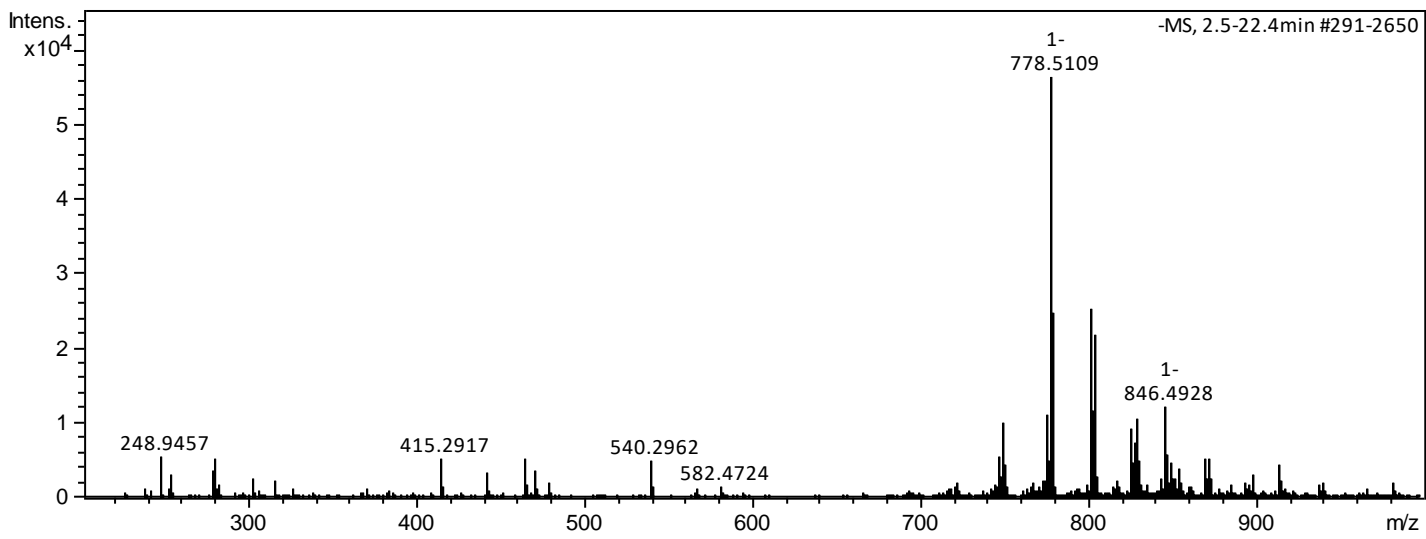

Supplement: s1 [file s1]
