# Supplementary figures and images for: COVID-19 Infection during Pregnancy: Disruptions in Lipid Metabolism and Implications for Newborn Health
Source: MDPI journal article supplement (doi:10.3390/ijms241813787), 2023-09-07

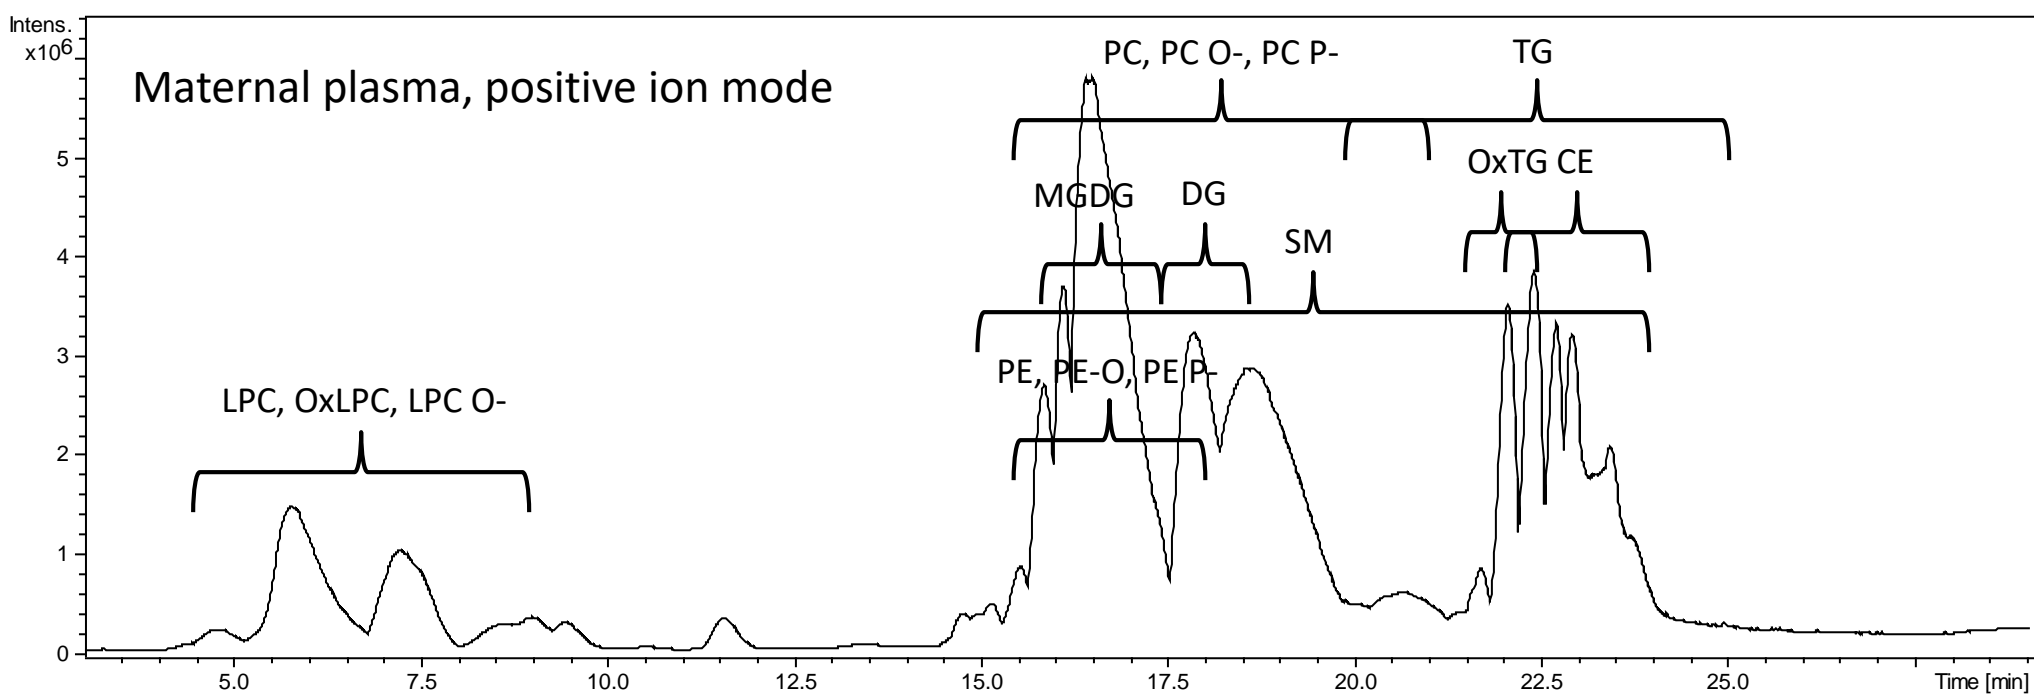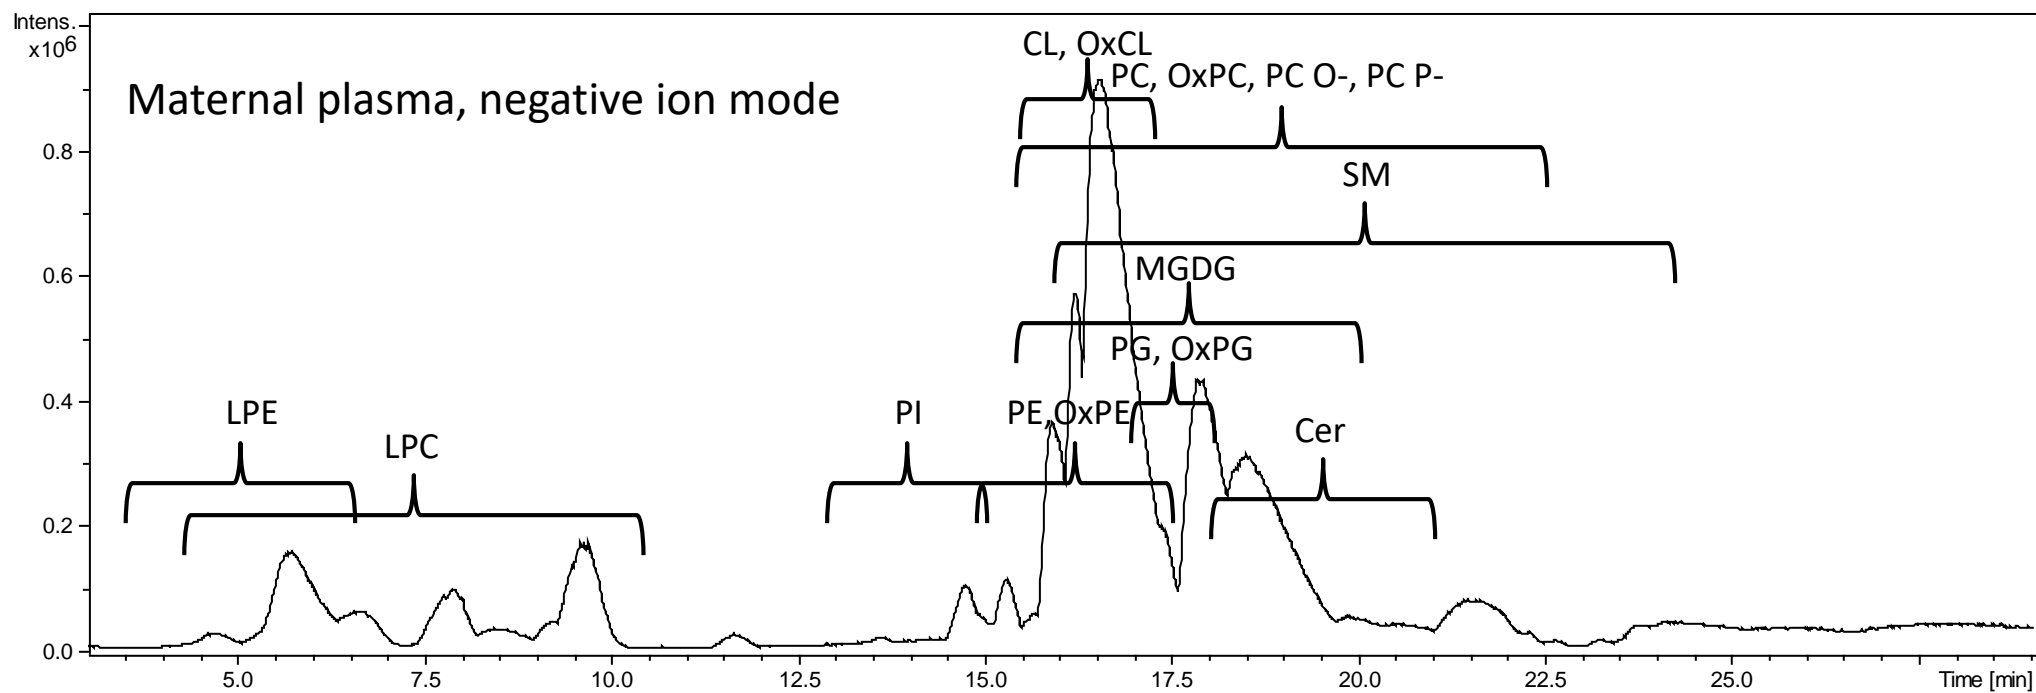

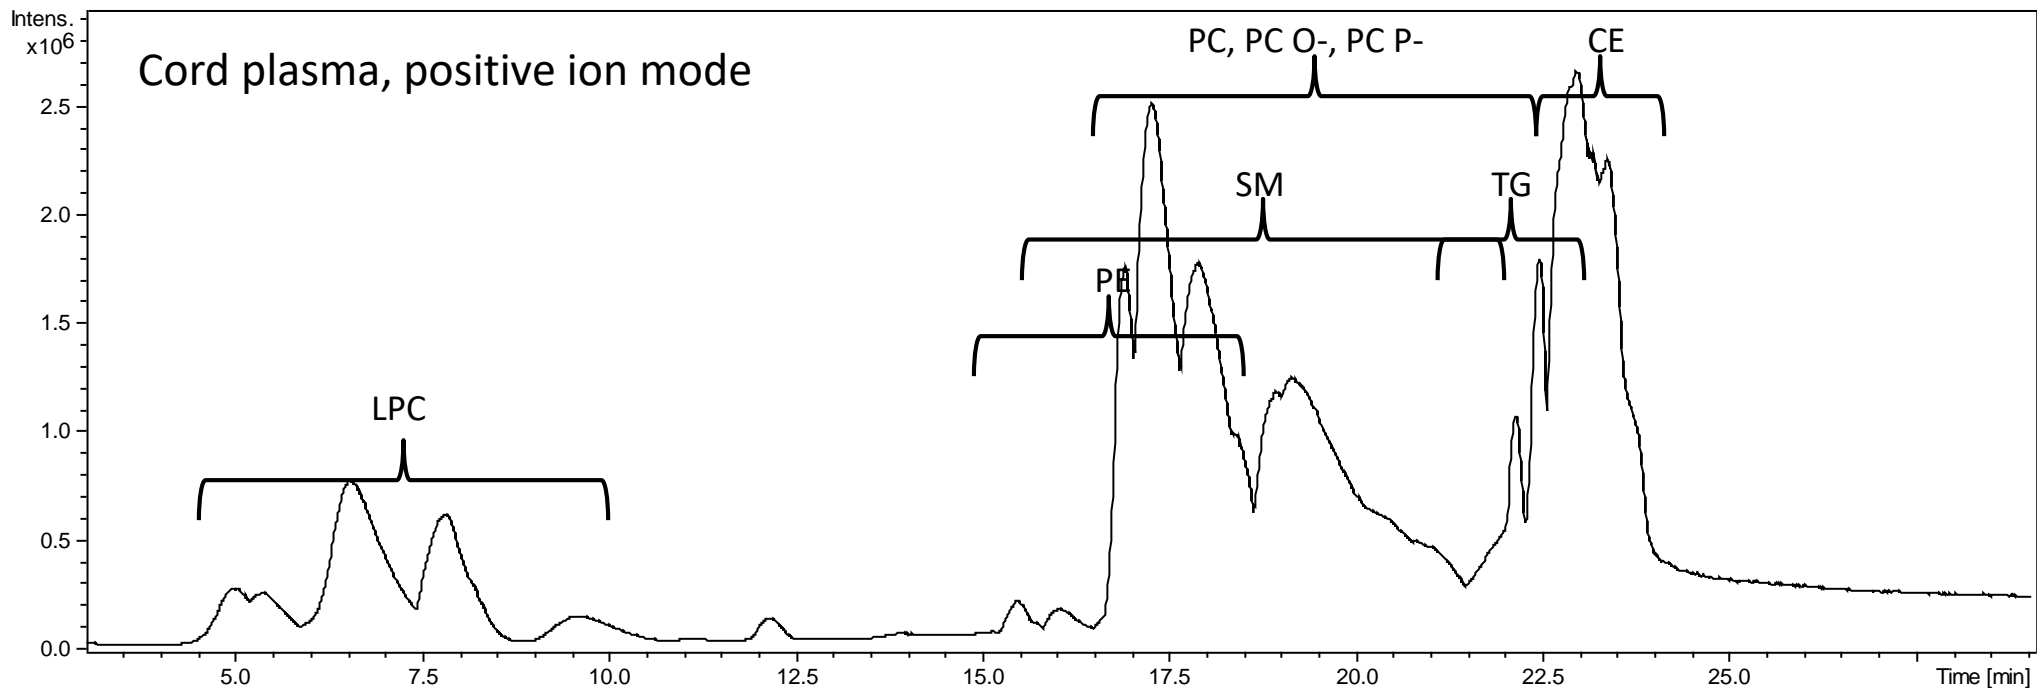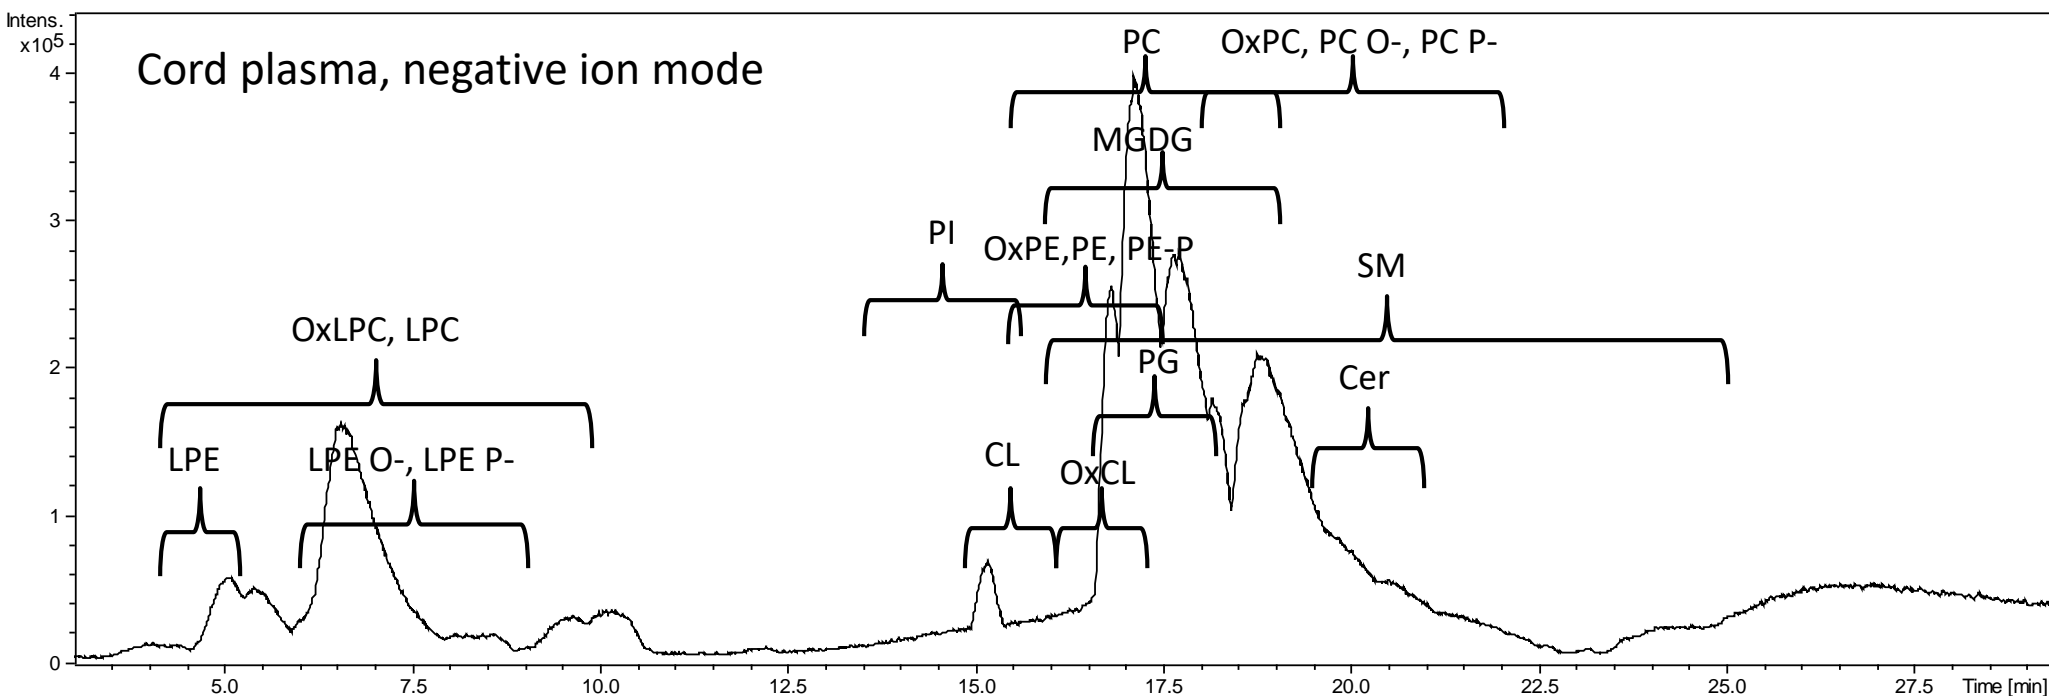

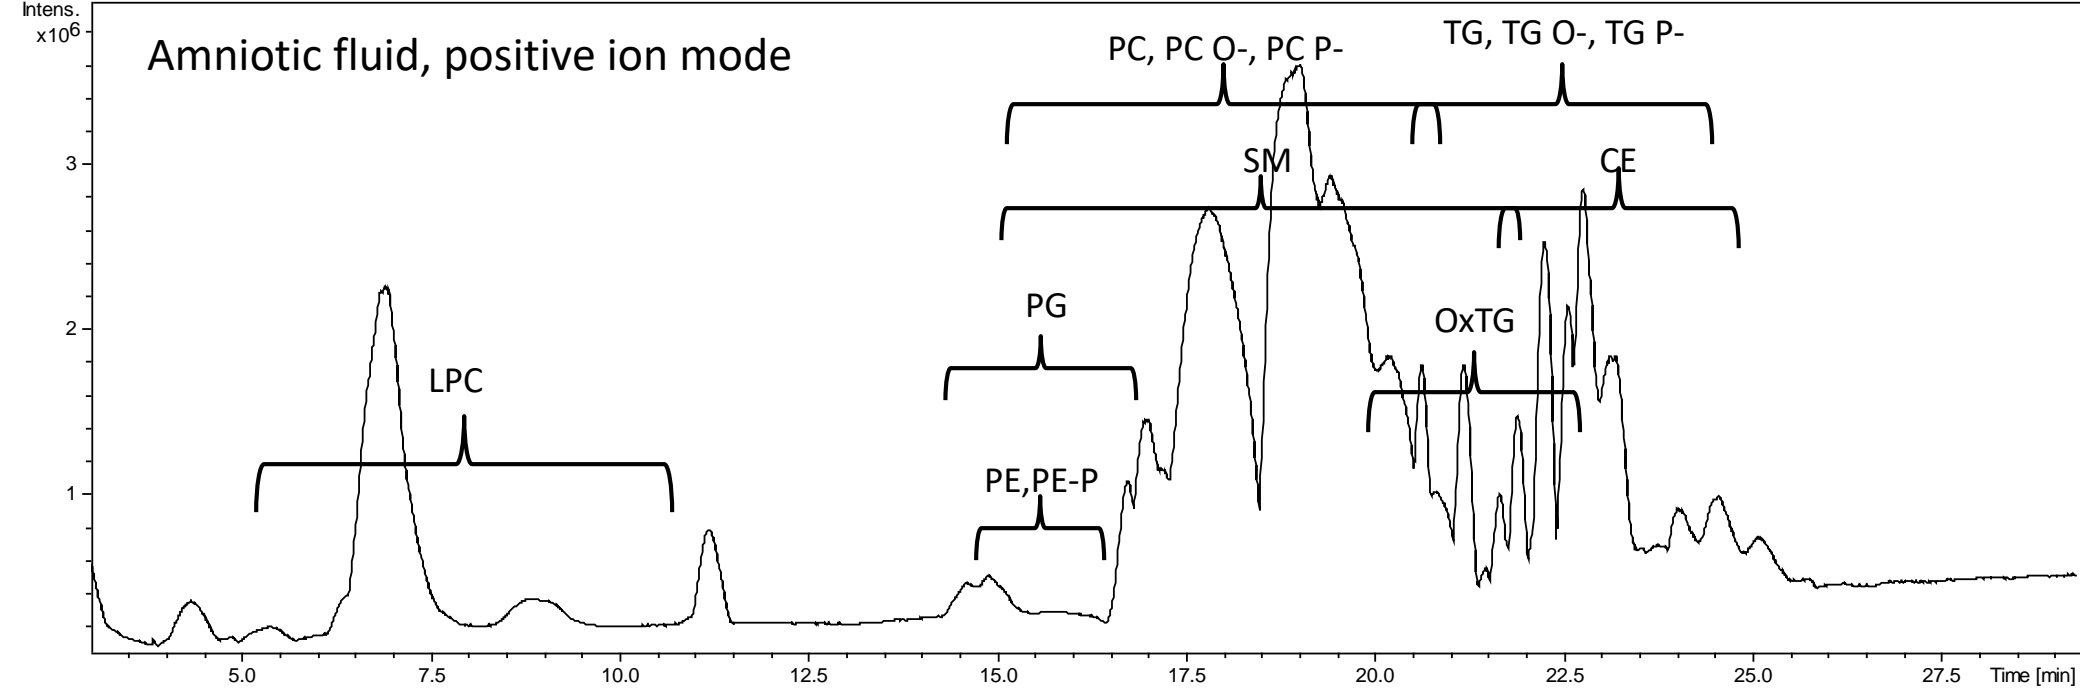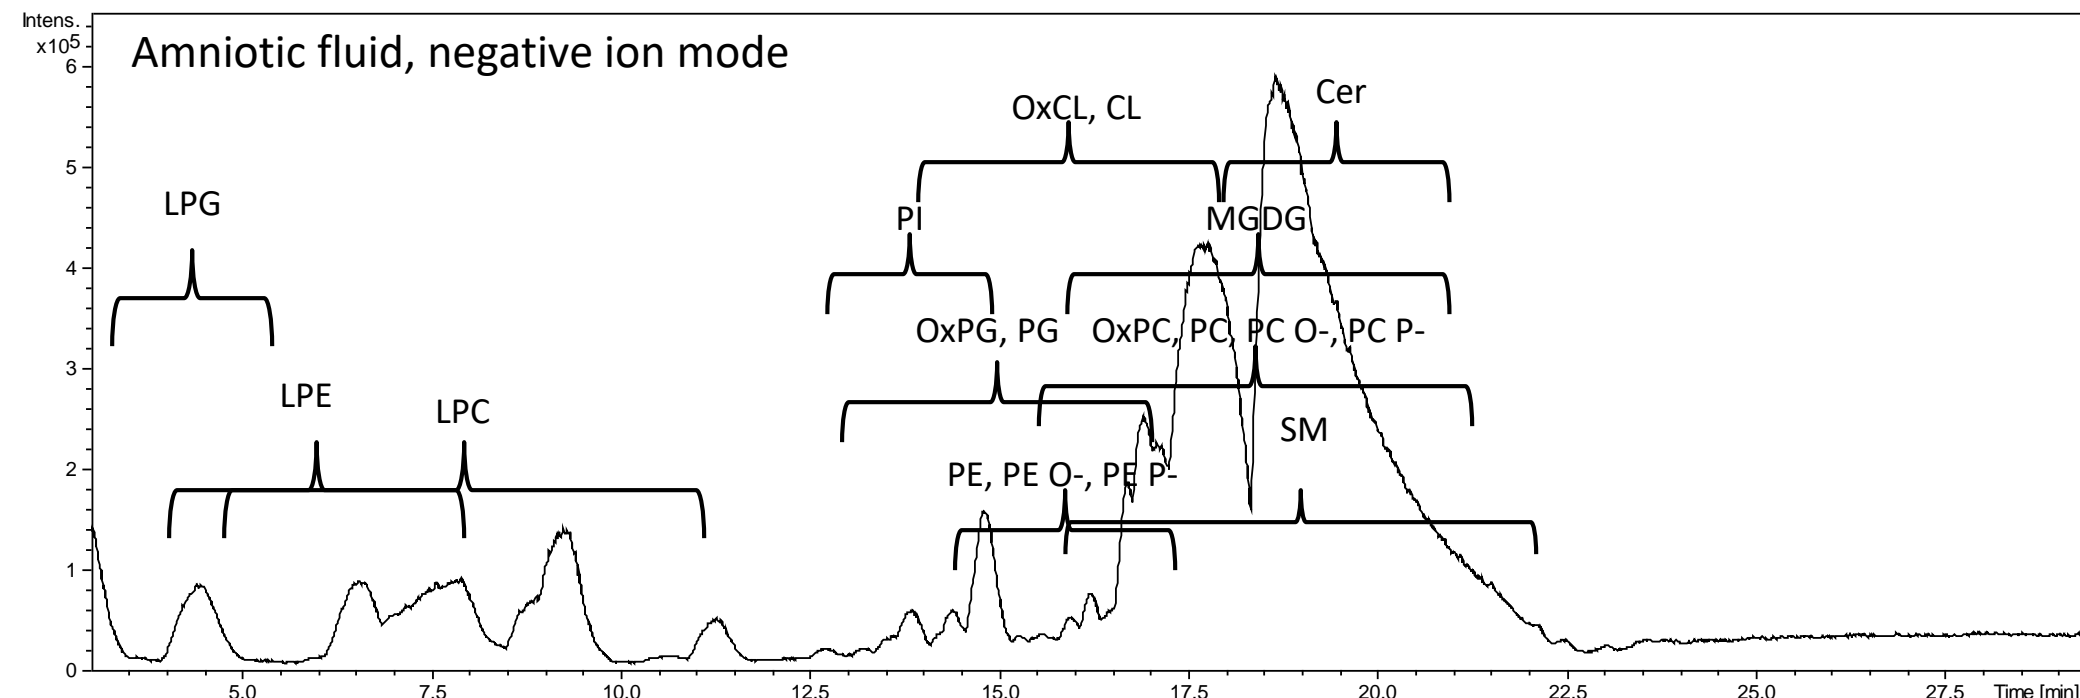

Supplement: s1 [file s1]
